# Supplementary material for: Jens Esmark's Christiania (Oslo) meteorological observations 1816–1838: The first long term continuous temperature record from the Norwegian capital homogenized and analysed
Source: Copernicus journal article supplement (doi:10.5194/cp-2016-60), 2016-06-20
Supplement: Supplementary file [file cp-2016-60-AC1-supplement.pdf]

1  
2  
3  
4  
5  
6  
7  
8  
9  
10  
11  
12  
13  
14  
15  
16  
17  
18  
19  
20  
21  
22  
23  
24  
25  
26  
27  
28  
29  
30  
31  
32  
33

# **Jens Esmark’s Christiania (Oslo) meteorological observations 1816-1838: The first long term continuous temperature record from the Norwegian capital homogenized and analysed**

**Geir Hestmark<sup>1</sup> and Øyvind Nordli<sup>2</sup>**

1 Centre for Ecological and Evolutionary Synthesis, CEES, Department of  
Biosciences, Box 1066 Blindern, University of Oslo, N-0316 Oslo, Norway

2 Norwegian Meteorological Institute (MET Norway),  
Research and Development Department, Division for Model and Climate Analysis,  
P.O. Box 43 Blindern, N-0313 Oslo, Norway

Correspondence to: Geir Hestmark ([geir.hestmark@ibv.uio.no](mailto:geir.hestmark@ibv.uio.no))

## **Abstract**

In 2010 we rediscovered the complete set of meteorological observation protocols made by professor Jens Esmark (1762-1839) during his years of residence in the Norwegian capital of Oslo (then Christiania). From 1 January 1816 to 25 January 1839 Esmark at his house in Øvre Voldgate in the morning, early afternoon and late evening recorded air temperature with state of the art thermometers. He also noted air pressure, cloud cover, precipitation and wind directions, and experimented with rain gauges and hygrometers. From 1818 to the end of 1838 he twice a month provided weather tables to the official newspaper *Den norske Rigstidende*, and thus acquired a semi-official status as the first Norwegian state meteorologist. This paper evaluates the quality of Esmark’s temperature observations, presents new metadata, new homogenization and analysis of monthly means. Three significant shifts in the measurement series were detected, and suitable corrections are proposed. The air temperature in Oslo during this period is shown to exhibit a slow rise from 1816 towards 1825, followed by a slighter fall again towards 1838.

34

35

## 36 **1 Introduction**

37 The current concern with climate change has increased the interest in early  
38 meteorological observation series and evaluation of their quality ( e.g. Bergström  
39 & Moberg, 2002; Auer et al., 2007). In a recent paper we analysed the temperature  
40 record for the Norwegian capital made 1837-2012 by the astronomical  
41 Observatory at the University of Oslo and the Norwegian Meteorological Institute  
42 (MET Norway) (Nordli et al., 2015). Previous to 1837 long term observations of  
43 the Oslo weather were known to have been made by Jens Esmark (1762-1839),  
44 professor of mining sciences at the University of Oslo (then Christiania). A first  
45 reanalysis of Esmark's observations was made by meteorologist B. J. Birkeland  
46 (Birkeland, 1925). Our rediscovery in 2010 of Esmark's original meteorological  
47 observation protocols has provided an opportunity to digitize, homogenize and  
48 analyze his data with modern methods.

49 Esmark is today mostly remembered for his pioneer ascents of many of  
50 Norway's highest peaks (Esmark 1802, 1812; Hestmark 2009), his discovery of  
51 Ice Ages, and his astronomical explanation of such dramatic climate change as  
52 caused by variations in the eccentricity of the orbit of the Earth, a hypothesis now  
53 recognized as a precursor of the theories of James Croll and Milutin Milankovich  
54 (Esmark, 1824, 1826; Andersen, 1992; Worsley, 2006; Rudwick, 2008; Berger,  
55 2012; Krüger, 2013). In his own lifetime he was primarily known as a skilful  
56 mineralogist and geologist. Throughout his life Esmark maintained a passion for  
57 meteorological observation with instruments he crafted himself in accordance with  
58 the highest contemporary standards. His main inspiration for this activity were his  
59 teachers at Copenhagen University, which he attended 1784-89; first among them  
60 the Astronomer Royal, professor Thomas Bugge (1740-1815), who in his  
61 observatory tower Rundetårn in the middle of Copenhagen made daily  
62 measurements of the weather (Willaume-Jantzen 1896). Esmark also befriended  
63 Bugge's instrument maker, the Swede Johan(nes) Ahl (1729-1795) (Esmark, 1825;  
64 Anonymous 1839). In addition Esmark followed the lectures of Christian Gottlieb  
65 Kratzenstein (1723-1795), professor of medicine and experimental physics, a  
66 'hands on' practical man who enjoyed crafting instruments and all sorts of  
67 mechanical machines (Snorrason, 1974, Splinter, 2007). From 1789 to 1791  
68 Esmark studied mining sciences at the Norwegian silver town of Kongsberg, and  
69 after further studies in Freiberg, Saxony and Schemnitz in today's Slovakia, he in

70 1798 moved back to Kongsberg to take up a position as Assessor in the central  
71 mining administration (*Overbergamtet*) of the dual kingdom Denmark-Norway. At  
72 Kongsberg he also lectured in mineralogy, geology and experimental physics at  
73 the Royal Norwegian Mining Seminar, acting as its temporary Inspector from  
74 1799, and permanent Inspector 1802-1815. From 1 January 1799 he three times a  
75 day recorded observations of the Kongsberg weather - air pressure on mercury  
76 barometers (in inches and lines), and air temperature in degrees of Reaumur;  
77 documented in a series of small notebooks running continuously with some  
78 lacunae until 16 September 1810, and rediscovered by the authors in 2010 (Esmark  
79 1799-1810). When Esmark in 1815 moved to the Norwegian capital Christiania  
80 (now Oslo) to become the first professor in the mining sciences at the University  
81 he continued this habit. At least from January 1816 up to and until the day before  
82 his death on 26 January 1839 he recorded air temperature and barometric pressure  
83 three times a day. The complete set of his 23 Christiania observation protocols,  
84 long believed lost, was rediscovered in 2010 by the authors, and is now safely  
85 deposited in the Norwegian National Archive (Riksarkivet) (Esmark 1816-1838).  
86 They provide a unique and detailed picture of the weather in Oslo in the early 19<sup>th</sup>  
87 century. From January 1818 to December 1838 tables of Esmark's observations  
88 were published every fortnight in the official newspaper *Den norske Rigstidende*  
89 (cf. Appendix A), and he thus acquired a semi-official position as Norway's first  
90 state meteorologist. Based on a number of previously unpublished documents  
91 (cited as Document 1 etc, with archival location in Reference list) we here present  
92 new metadata for Esmark's meteorological observations from Christiania, and  
93 homogenize, analyse and evaluate his original temperature data with modern  
94 statistical tools to characterize the temperature variations in the Norwegian capital  
95 in this period.

96

## 97 **2 Metadata**

### 98 **2.1 The location - No. 308, Vestre Rode - Øvre Vollgate 7.**

99 Esmark's observations were made at his home (cf. Esmark 1823: *De ere tagne i*  
100 *min Bopel*), and there is no evidence indicating that he changed the location. On 19  
101 August 1815 Esmark was registred as owner of property No. 308 in Vestre Rode  
102 (i.e. Western Quarter), one of the four old quarters of Christiania town (Document

103 1). It was a modest one-and-half storey house built late in the 18<sup>th</sup> century with an  
104 adjoining garden. Esmark's continued residence at this address until his death is  
105 documented in annual censuses and tax protocols (Document 2). Property No. 308  
106 was situated on the north-western side of the street Øvre Vollgate (Øvre  
107 Woldgaden), laid out literally *on* what used to be the outermost western rampart  
108 (*voll*) of nearby Akershus Castle and Fortress (Fig. 1). It was a natural rock  
109 promontory above a meadow to the west where the poor fishing village Pipervigen  
110 would develop later in the 19<sup>th</sup> century, today the site of Oslo Town Hall. In 1815  
111 Øvre Vollgate constituted the south-western limit of Christiania, a town with only  
112 about 15000 citizens (Myhre 1990). Until 1814 the main administration centre of  
113 the dual kingdom was in Copenhagen, but with Christiania in that year acquiring  
114 the new parliament and government after the separation of Norway from  
115 Denmark, the town expanded rapidly. When street numbers were introduced,  
116 Esmark's property was numbered Øvre Vollgt No. 7. The present Øvre Vollgate 7  
117 – an office highrise – comprises previous numbers Øvre Vollgate 3, 5 and 7.

118 Esmark's property No. 308 and all neighbouring properties were measured  
119 and mapped for the new matriculation of Christiania in the summer of 1830, and  
120 thus we have very precise data on his house and the surrounding properties at the  
121 relevant time (Document 3). The whole property roughly constituted an elongated  
122 rectangle, approximately 14 m x 60 m (Fig. 2). The unit used in these  
123 measurements was the 'Norwegian alen' (*Norsk alen*), determined by law in 1824  
124 to be 62.75 cm. It was divided into two feet, each divided into 12 inches, each  
125 divided into 12 lines. No. 308 was measured to 2026 square alen, of which the  
126 house (including a yard) was 733 ½ and the garden 1292 ½ square alen (1 square  
127 alen = 0.3937 m<sup>2</sup>). Thus the whole property was ca. 800 m<sup>2</sup>, and the house  
128 (including yard) ca. 290 m<sup>2</sup>. The house had a 22 alen 6 inch (ca. 14 m) long  
129 façade towards the street Øvre Voldgate, constituting the south eastern border of  
130 the property, with windows, doors, and a gate leading in to the back yard (Fig. 3).  
131 Øvre Vollgate street runs from SW to NE at an angle of roughly 32° NE (400  
132 degrees). At the back the house surrounded a small yard, with a narrow passage  
133 opening out to the garden in the NW. As it would have been hazardous to place the  
134 meteorological instruments on the street-side of the house, where passers-by could  
135 tinker with them, it is almost certain that they were placed in Esmark's back yard,  
136 a wellguarded space. When the house was finally demolished in 1938, it was in

137 such a bad condition that the Oslo city health authorities demanded the whole  
138 property to be sprayed with hydrocyanic acid and that none of the fungus-infected  
139 material be used for construction elsewhere (Document 4).

140 Esmark's garden on the NW side of the house and court yard was a  
141 continuous slope, dropping ten alen (6,25 m) down along 66 alen length towards  
142 Pipervika. Here it was most probably limited by a fence towards the Præste Gade  
143 street which later changed name to today's Rosenkrantz street. In 1841, a couple of  
144 years after Esmark's death, most of this garden was indeed sectioned out and sold  
145 to form the new property Rosenkrantz gate 26. In Esmark's time, however, the  
146 promontory remained an open garden space. His neighbours on both sides (No.  
147 307 and No. 309) had the same arrangement of house and garden, with facades to  
148 Øvre Vollgate and gardens sloping down on the back to Præstegaden (Document  
149 5). To the north of the lowermost part of Esmark's property was an open space  
150 called Jomfru Wold's Løkke (No. 368). South of this lower part of the garden was  
151 the street Pipervigbakken, leading down from Rådhusgaten street passing by the  
152 outer ramparts of Akershus fortress and Castle. The sea with Pipervika bay  
153 (Piperviks Bugten) was less than 200 m south of Esmark's garden. His garden was  
154 not an entirely constant environment. In 1823 for instance, he received several  
155 fruit trees from a Danish friend which he planted in the garden (Document 6).

156 It was a modest residence for a professor, situated in a comparatively poor  
157 part of town, with mainly craftsmen, tradesmen and artisans in the neighbourhood  
158 (Myhre 1990: 40). Here Esmark, a widower since 1811, moved in with his three  
159 sons Hans Morten, Petter and Lauritz, a maid and a manservant (Document 2).  
160 His daughter Elise resided with her grandparents in Copenhagen, but later returned  
161 to Norway to take up residence in No. 308.

162

## 163 **2.2 The observers**

164 The great majority of the Christiania observations were made and noted down by  
165 Esmark himself who has an easily recognizable handwriting. His position as  
166 professor in the mining sciences did however sometimes cause him to leave town  
167 on short or long field excursions, some lasting several months. He was away from  
168 Christiania on long voyages in 1818 (Hallingdal), 1819 (Kristiansand), 1822  
169 (Bergen), 1823 (round-trip south Norway), 1826 (Setesdalen), 1827 (Trondhjem)  
170 and 1829 (Copenhagen). In his absence his sons seem to have been instructed to

171 continue daily observations, and there are extremely few missing data points. The  
172 oldest son Hans Morten Thrane Esmark (b. 1801) in 1825 became a chaplain in  
173 Brevig and moved from Christiania; Axel Petter (b. 1804) became a sailor and was  
174 often away from home; Lauritz Martin (b. 1806), later a professor of zoology at  
175 the Christiania University, and daughter Elise Cathrine (b. 1800) remained at home  
176 until Esmark's death. The sons evidently did not fully share their father's passion,  
177 and although instrument readings were meticulously maintained, the qualitative  
178 notes on weather are often restricted to a single word in Esmark's absence. A  
179 claim (Birkeland 1925: 5) that the botanist Martin Flor performed the observations  
180 in Esmark's absence has not been substantiated, and anyway Flor committed  
181 suicide in 1820.

182

### 183 **2.3 The hours of day**

184 Esmark's Christiania observation protocols do not indicate the precise hours when  
185 the observations were made. The columns are given as morning, noon (really  
186 afternoon) and evening (*Morgen, Middag, Aften*). A note on the first published  
187 table in *Den norske Rigstidende* on 24 January 1818, also says *Morgen, Middag og*  
188 *Aften* without further specification (Fig. 5). In a summary table of 15 years (1818-  
189 1832) published 1833 Esmark is more explicit: 'The barometer observations have  
190 been made daily in the morning, afternoon and evening; in later years at 8 ½  
191 o'clock morning, at 3 ½ o'clock afternoon and 9 ½ o'clock evening; thermometer  
192 observations at the same times in the afternoon and evening and in the morning  
193 with the help of the night thermometer. From this the middle height is  
194 taken.' (*Barometerobservationerne ere dagligen gjorte om Morgen, Eftermiddagen og Aften; i de senere Aar Kl. 8 ½ Morgen, Kl. 3 ½ Eftermiddag og Kl. 9 ½ Aften; Thermometerobservationerne paa samme Tider om Eftermiddagen og Aften og om Morgen ved Hjælp af Natthermometret. Heraf er taget Middelhøiden.*) (Esmark 1833: 235). Thus 8.30 AM, 15.30 (PM), 21.30 (PM). The hour 3 ½ PM probably coincided with Esmark's return to his house from the lectures at the University just a few blocks away. He regularly lectured from 2 to 3 PM. The phrasing "in later years" suggests that the hours had not been constant throughout the whole series, and we address this problem in the analysis.

203

### 204 **2.4 The instruments and their position**

205 In a note to his first table presented in the journal *Den norske Rigstidende*, on 24  
206 January 1818, Esmark provides a few details of his measurements: “The  
207 observations are made 34 Rhinelandic feet [i.e. 10.68 m] above the sea, and are the  
208 middle value of observations made morning, noon and evening. The barometer  
209 heights are corrected as they would have been if the barometer was subject to a  
210 temperature of 0°. The thermometer hangs freely against north.’ (*Observationerne*  
211 *ere anstillede 34 Rhinlandske Fod over Havet, og ere Middeltallet af*  
212 *Observationer, anstillede Morgen, Middag og Aften. Barometerhøiderne ere*  
213 *corrigerede saaledes, som de skulle være, dersom Barometret havde været udsat*  
214 *for 0° Temperatur. Thermometret hænger frit imod Nord.*) (Fig. 5). Esmark also  
215 notes that ‘The barometer height is reduced to 0° R. If one wants it reduced to sea  
216 level, one must add a line or 1/12 of an inch to its height, so that the barometer  
217 height at sea level becomes 28.1,20 in French measure.’ (*Barometerhøiden er*  
218 *reduceret til 0° R. Vil Man have den reduceret til Havets Overflade, maa Man til*  
219 *den anførte Høide lægge en Linie eller 1/12 Deel af en Tomme, saa at*  
220 *Barometerhøiden ved Havets Overflade bliver 28.1,20 i Fransk Maal.*) (Esmark  
221 1833: 235).

222  
223 *Thermometers*. Esmark all his life used the Reaumur scale; R. The precision of his  
224 Reaumur thermometer was 1/2 of a degree. On a table of averages for the years  
225 1816-1822 Esmark notes: ‘The thermometer observations are made in shadow in  
226 free air with a Reaumur thermometer, which boiling point is determined at 28  
227 inches 2 lines (French measure) barometric height.’ (*Thermometerobservationerne*  
228 *ere gjorte i Skyggen i fri Luft med et Reaumurs Thermometer, hvis Kogepunkt er*  
229 *bestemt ved 28 Tommers 2 Liniers (fransk Maal) Barometerhöide.*) (Esmark  
230 1823). In Esmark’s observation protocol for the year 1816 some instrumental  
231 corrections are given for what is claimed to be Esmark’s thermometer. They are  
232 not written by Esmark himself, most probably they are notes written by Birkeland,  
233 who says he has them after Hansteen 1821-23, but it is not certain that they belong  
234 to the thermometer used by Esmark. The corrections are listed in Appendix B but  
235 have not been used in the present paper.

236  
237 *Barometer*. Of the barometer used Esmark (1833: 235) states: ‘The barometer is a  
238 simple barometer, the tube of which is 2 ½ line in diameter and which capsul is 40



239 lines in diameter, and calibrated after a siphon barometer.' (*Barometret er et*  
240 *simpelt Barometer, hvis Rør er 2 ½ Linie i Diameter og hvis Capsel er 40 Linier i*  
241 *Diameter, samt justeret efter et Hævertbarometer.*)

242

## 243 **2.5 The protocols and data recorded**

244 Esmark's Christiania protocols are handmade, folded sheets of white paper cut up  
245 and sewn in with a thin grey cardboard cover, one protocol for each year, 23  
246 protocols in all (Esmark 1816-1838). Esmark interfoliated the official printed  
247 *Almanach* for Christiania. This had for each month 16 days on each page, and thus  
248 Esmark wrote down his data for 15 or 16 days on the first page of a month and the  
249 remaining days from 17 to 28, 29, 30 or 31 on the next page (Fig. 4). The protocols  
250 start on 1 January 1816 and end 31 December 1838, only 26 days before his death;  
251 altogether 8401 days of continuous measurements. There are only a few small  
252 lacunae. Photographs of all the protocols are available at MET Norway (Klimadata  
253 samba server, HistKlim skanna dokument), and digitized values, converted from  
254 °R to °C, can be downloaded from MET Norway's home page: <http://www.met.no>.  
255 Esmark & sons continued observations in January 1839 until the day before his  
256 death 26 January, but these observations are only known through the newspaper  
257 *Morgenbladet*, which had published Esmark's daily measurements since 1834.

258 Three times a day Esmark recorded temperature to a half degree, and air  
259 pressure in inches and lines (Fig. 4). In the right hand margin he noted the weather  
260 (*Veirliget*) with qualitative terms; see also Esmark (1833). He used a fairly limited  
261 number of categories: *Precipitation: lidt Regn (a little rain); Fiin Regn (drizzle);*  
262 *Regn (rain); Regn Bygger/Bjgger (showers); Regn af og til (Rain now and then);*  
263 *megen Regn (much rain); Sne (snow); Sne Flokker (snowflakes); Sne Bygger*  
264 *(snow showers). Cloud cover: Klart (clear), enkelte Skyer (a few clouds); tynde*  
265 *Skyer (thin clouds); skyet (cloudy); skyer i Horizonten (clouds in the horizon);*  
266 *disig (haze); Taage (fog). The most common category was tykt (thick) which*  
267 *means a grey day with haze, often with precipitation. Wind: Wind direction was*  
268 *usually recorded only once a day, in the afternoon, with categories N, S, V and O,*  
269 *and combinations, e.g. N. O. (nord ost/north easterly). Other: Torden (thunder);*  
270 *Nordlys (northern lights); Flekker i Solen (sunspots); one or two circles around the*  
271 *sun; Høyt vand (high sea level). In June 1818 Esmark introduced a new parameter:*  
272 *precipitation, measured with a rain gauge, and in the June summary, he could*

273 announce: ‘In this month there has, according to the rain gauge, fallen rain to a  
274 height, which, if it had been standing, had constituted a height of 1 inch and 9 and  
275 7/12 line. The rain gauge is situated 15 feet above sea level.’ The low altitude of  
276 the rain gauge suggests that it was placed at the lower part of the slope in his  
277 garden. In October 1820 he presented the readers of *Rigstidende* to his new design  
278 for a hygrometer – an instrument to measure air humidity (Esmark, 1820). It was  
279 modified from a model developed by John Livingstone, a M.D. from Canton,  
280 China, published in the *Edinburgh Philosophical Journal* in 1819 (Livingstone  
281 1819). The general idea was to put a moisture absorbing/releasing chemical  
282 substance (Livingstone used pure sulphuric acid, which was also used to produce  
283 ice) on one side of a balance, balanced against a weight on the other side. The  
284 balance was placed under a glass jar open in the bottom to let air freely flow in and  
285 out, and to protect it from precipitation. Esmark made two new hygrometers  
286 according to this model. ‘Anyone who desires to see these hygrometers, can see  
287 them at my house’ (*Enhver, som har Lyst dertil, kan see disse Hygrometere hos*  
288 *mig.*)(Esmark, 1820) He had tested them for several months, and thought they  
289 could be used by farmers to predict weather change as a substitute for barometers.  
290 He did not, however, use the hygrometer data for his meteorological tables. For the  
291 year 1821 he presented more regular monthly data on precipitation in inches –  
292 from 1 May through October – apparently the months without frost.

293

## 294 **2.6 The published tables**

295 Starting on Saturday 24 January 1818, with a table presenting weather data for the  
296 first half of the month, the semi-official daily *Den norske Rigstidende* published  
297 Esmark’s meteorological observations, which thus acquired an official air. (Fig. 5).  
298 It became a regular series, published twice a month – one table for the first half of  
299 the month, one for the second half – a total of 24 tables each year, all with the  
300 same title ”Meteorologiske Iagttagelser i Christiania [year], anstillede af Prof.  
301 Esmark.” (Meteorological observations in Christiania [year], made by Prof.  
302 Esmark) etc. This series running from 1 January 1818 to 15 December 1838 is  
303 absent from all previously published bibliographies of Esmark’s works, but in fact  
304 runs to no less than 503 published tables (!) (Appendix A). They present 7665 days  
305 of continuous observations. In addition comes the two full years of 1816 and 1817,  
306 only published summarily by Esmark (1823) but with complete record preserved

307 in the original protocols. The whole year 1818 was summed up on 8 January 1819  
308 with means etc., and here Esmark also compared the Christiania data to those  
309 obtained by Wargent in Stockholm, by Bugge in Copenhagen, and (no  
310 observator given) in St. Petersburg, Russia. It was not a weather forecast but  
311 rather a weather ‘backlog’, and this may have dimmed their public interest  
312 somewhat. The data given in these published tables differ from the raw data of the  
313 protocols by being daily averages. For each day he gave the barometric pressure  
314 and temperature, averaged from observations made in the morning, afternoon, and  
315 evening (at first without further precision of hour). To calculate these averages he  
316 apparently used the formula:

$$317 \quad T_m = 1/4 (T_I + 2T_{II} + T_{III}) \quad (1)$$

318 where  $T_m$  is Esmark’s daily ‘mean’ temperature, and  $T_I$ ,  $T_{II}$ , and  $T_{III}$  are the  
319 observed temperature morning, afternoon and evening, respectively. To the tables  
320 for the second half of each month, he also appended a note with the mean  
321 barometric pressure and temperature for the entire month, and indicated which  
322 days had the maximum and minimum air pressure and temperature. The mean  
323 temperature was given to  $1/100^{\text{th}}$  degree (a spurious precision). The series  
324 continued in 1820, now also with the daily wind direction. Esmark evidently  
325 trusted only himself to calculate the means and set up the tables, and thus the  
326 readers of *Rigstidende* sometimes had to wait for months to read the weather for  
327 the last fortnight when he was off on some excursion. From 1834 Esmark’s  
328 observations were also published in the Christiania newspaper *Morgenbladet* every  
329 day, with two days delay, i.e. observations for the 1<sup>st</sup> day of the month were  
330 published on the 3<sup>rd</sup> etc. This was initiated after Christiania doctors suspected a  
331 connection between the weather and the cholera epidemics which struck Norway  
332 from 1833 and forward.

333

334

### 335 **3 Methods**

336

#### 337 **3.1 Homogeneity testing**

338 A homogenous climatic time series shows variations in climate without being disturbed by  
339 other factors involved, like changes in the environment, observational procedures or

340 instrument calibration. For the study of climate variations the use of homogenous series is of  
341 paramount importance, otherwise the climate analysis might be wrong (e.g. Auer et al., 2007;  
342 Moberg and Alexandersson, 1997; Tuomenvirta, 2001). For testing the homogeneity of  
343 Esmark's temperature series we selected the Standard Normal Homogeneity Test (SNHT)  
344 with significance level = 0.05, which has been widely used for testing of both precipitation  
345 series and temperature series (Alexandersson, 1986; Alexandersson and Moberg, 1997;  
346 Ducré-Robitaille et al., 2003). The first version of the test (Alexandersson, 1986) had one step  
347 change as the only possibility, whereas in the version of 1997 both double shifts and a trend  
348 were possible outcomes of the test. In any year the significance of a potential break is  
349 examined. The testing followed the principle of comparing a candidate series (the series under  
350 testing) against a reference series. The reference might be series from one or more  
351 neighbouring stations. A candidate series might also be observations at one particular time of  
352 the day, which are compared with other observation times for the same station. In the latter  
353 case we call it "internal testing". Contemporary neighbouring series overlapping Esmark's  
354 observations are too short to be used in the homogeneity testing. The nearest stations that  
355 could have been used are Stockholm/Uppsala about 350 km from Oslo. The problem with  
356 using series so far away is that spatial temperature variations could be interpreted as  
357 inhomogeneities. Therefore our chosen method is internal testing. Later measurement series  
358 from observation stations in the Oslo area may however be of some use in some analyses, and  
359 these are listed with Esmark's in Table 1 with their national station number (identifier) and  
360 name. While the official names of the stations refer to their sites we will in the text for  
361 convenience often refer to the names of the observers, i.e. the column 'additional information'  
362 in Table 1. Before the analysis started all observations in degrees of Reaumur were converted  
363 into degrees of Celsius by multiplying by the factor 1.25.

364

## 365 **4 Results**

366

### 367 **4.1 Detection of inhomogeneities**

368 First we will use SNHT for detection of the inhomogeneities and thereafter treat each  
369 inhomogeneity in more detail, and come up with corrections. The testing was performed both  
370 for seasonal (Table 2) and monthly (Table 3) resolutions where observations taken in the  
371 morning (I), midday (II) and evening (III) were compared with each other. By comparing  
372 several test results it was possible to decide at which observation time a shift (inhomogeneity)  
373 occurred. Most striking are the huge shifts detected in spring, summer and autumn when the

374 morning observation was involved. The most probable year for the shift was 1827; in  
375 particular this was true for the single shift test. Here we apply the common convention to  
376 define the shift year as the last year before the shift. We have to conclude that the morning  
377 observation is inhomogeneous. Further investigation of the daily observations (not shown)  
378 suggested that the change took place in the month of March 1828.

379 When the evening observation was tested against the midday observation a shift  
380 seemed to occur in 1820 or 1821, most probably in 1821. But this break in homogeneity was  
381 much less than that of the morning observation, cf. Table 2. The shift seems to be absent or  
382 very weak during winter so exact dating was impossible. For convenience the end of 1821  
383 was adopted as the time of the inhomogeneity.

384 Tests including the midday observation revealed no additional shifts than those  
385 already detected. The occurrence of the shifts in the tests I vs II and III vs II seemed to reflect  
386 shifts either in the morning or in the evening observations. For the winter season a shift in the  
387 last part of the series was detected, possible shift years were 1832, 1833 or 1834.  
388 The large shift in the morning observation could have masked possible smaller shifts in the  
389 series on both sides of this shift. Therefore the single shift SNHT was applied on two different  
390 parts of Esmark's series: 1816.01-1828.02 and 1828.03-1838.12, parts 2 and 3 in Table 2.  
391 However, no further shifts in the series were detected.

392

393 Thus there are three shifts that seem reliable, one in 1821 for the evening observation, one in  
394 1827 (probably 1828.02) for the morning observation and one during winter with possible  
395 shift years 1832, 1833 or 1834. We now proceed to propose corrections.

396

#### 397 **4.2 Correcting the shift in 1821.12 in the evening observation**

398 This inhomogeneity was corrected by using the midday observation that came out of the  
399 SNHT as homogenous. The monthly mean difference between the midday observation and the  
400 evening observation on each side of the shift was calculated. Then the evening observation  
401 was corrected by adding monthly correction terms so that this mean difference was constant  
402 on each side of the shift. It is most common to correct the early part of the series so this was  
403 done also here. Therefore the period 1816.01-1821.12 was corrected, whereas the rest of the  
404 series was not. The corrections are given in Table 4.

405

406 The corrections are largest in the months where the daily temperature wave is largest, so one  
407 could hypothesize that a change in the observation time was the reason for the shift. Strictly

408 speaking we know Esmark's observation times only in 1833, so this hypothesis is not in  
409 contradiction to metadata. But observation times cannot be the only reason for the shift,  
410 because it appeared also in midwinter when the daily temperature wave is weak. Moreover,  
411 the amounts of the corrections are so large that only observation times near midnight would  
412 compensate for the low values of the evening observation. Observation times that late seem  
413 unlikely. There is some indication that a changed environment could have played a role for  
414 this inhomogeneity as Esmark in 1823 planted fruit trees in his garden, cf. Metadata. A one  
415 year mismatch of the shift detected by the SNHT is not uncommon.

416

### 417 **4.3 Correcting the shift in 1828.02 in the morning observation**

418 Esmark (1833) relates that he uses "a night thermometer" for the morning observation. Our  
419 hypothesis is that in Esmark's terminology the "night thermometer" was a minimum  
420 thermometer. That means that he at some point started to note the night minimum temperature  
421 in the column for the morning temperature, rather than the actual morning temperature when  
422 he read the barometer. This hypothesis was tested by studying the difference between  
423 Esmark's evening observation and the morning observation the following day for the three  
424 homogenous intervals, Table 5, (the winter inhomogeneity in the 1830s was ignored). For  
425 comparison we used the hourly observations (1993.09-2015.09) at the modern station Oslo –  
426 Blindern (18700 Oslo), where the difference between the observation at 21 UTC and the  
427 minimum temperature for the following night is presented in row 4 in Table 5. The interval  
428 for the night minimum was from 21 to 08 UTC, i.e. the same observation times as Esmark  
429 used at least for his barometric observations in 1833.

430

431 In the earliest time interval (row 1) the differences in Esmark's observations are very much  
432 smaller than those from Blindern, so it is impossible that Esmark in this early interval could  
433 have recorded the nightly minimum temperature in the column for the morning observation.  
434 In the next interval (row 2) the differences are somewhat larger, but far too small compared to  
435 Blindern so the same conclusion has to be drawn: no minimum thermometer was in use.  
436 However, in the third interval (row 3) the differences are nearly the same as those for  
437 Blindern. Even the monthly variations throughout the year correlate well. We conclude that  
438 Esmark for the 'morning observation' used a minimum thermometer in the period 1828.03-  
439 1838.12. Before that he observed temperature in the morning with an ordinary thermometer.

440 Minimum thermometers were certainly available by 1828. Already in 1790 a spirit  
441 thermometer with a glass index, very much like those used up to this day at manual stations,  
442 was described to the Royal Society in Edinburgh (Middleton, 1966: 152).

443

444 If the minimum thermometer was set at the evening observation, the values in the column for  
445 morning observation should always be equal or lower than the evening temperature the  
446 previous day. In December this is not true for 26% of the observations and in June for 6%.

447 These figures reduce to 6% and 2% in December and June respectively for violations no more  
448 than 1°C. In practice different exposure of the two thermometers may violate this test, and one  
449 should also take into account the possibility of instrumental errors in Esmark's thermometers.

450 We may conclude that the percentage of violation is not large enough to contradict our  
451 conclusion that a night minimum thermometer was in use. The normal procedure for  
452 meteorological institutes when minimum thermometers are introduced is to change the  
453 formula for monthly mean calculation. Therefore the morning temperature will not be  
454 corrected. Homogeneity in the monthly means will be obtained by changing formula for  
455 monthly mean calculation, see section 4.5.

456

#### 457 **4.4 Correcting the shift in the 1830s**

458 A significant inhomogeneity in winter for the morning observation (in this period  
459 identified as minimum temperature) was detected by the SNHT double shift, Table 2 part  
460 1 I vs II, and also by the single shift test when the time window was 1828.03-1838.12,  
461 Table 2, part 3. Formally a significant shift in spring was also detected, Table 2 III vs  
462 II, but with only three years on one side of the shift its significance was considered  
463 doubtful. The shift in winter had the character of an almost linear and continuous  
464 inhomogeneity, Fig. 6. The difference between the evening observation and the morning  
465 observation increased quite steadily from 1831 to 1838, whereas it was constant during the  
466 years 1829-1831. The explanation may be a change in the observation times. According to  
467 Esmark (1833) his observation times were, see Metadata.

- 468 • Morning: 08:30 ChT = 08:43 CET = 7:43 UTC
- 469 • Midday (afternoon): 15:30 ChT = 15:43 CET = 14:43 UTC
- 470 • Evening: 21:30 ChT = 21:43 CET = 20:43 UTC

471 ChT = Christiania time i.e. local time for Christiania (Oslo), CET = Central European  
472 Time, UTC = Universal Time Coordinated.

473 These observation times were for the barometric pressure, but in the afternoon and evening  
474 the thermometer was read at the same time as the barometer, but Esmark does not explicitly  
475 say that the morning thermometer was read at the same time as the barometer. He also use the  
476 term “in the later” years so we do not know from which year these observation times were  
477 introduced or if he continued to use them also in the following years 1834-1838.  
478 Our hypothesis is that Esmark has had another observation time for the temperature  
479 observations in the morning than for the pressure observations. Pressure could be observed  
480 inside the house, but for the temperature observations he possibly had to leave the house for  
481 his garden. Esmark might originally have observed temperature and pressure at the same time  
482 also in the morning, but with the introduction of the minimum thermometer he could have  
483 thought that the observation time for the morning temperature was not important. In spring,  
484 summer and autumn he obviously was right in his thinking as minimum temperature occurs  
485 earlier than the morning observation (8:30 ChT), but in winter the minimum temperature  
486 often occurs later in the day as the systematic daily temperature wave is weak. This can  
487 explain the changing difference during winter and the stable differences during the other  
488 seasons. As Esmark grew older and more frail he may have got up in the morning later and  
489 later. Progressive illness and susceptibility to cold in his later years (Anonymous 1839) could  
490 have made it less convenient to leave the house for the garden in the morning. Following this  
491 hypothesis the minimum temperature was corrected,  $\Delta T$ , by use of formula (2) for the winter  
492 season in accordance with the regression line shown in Fig. 6, where  $a$  = year (period 1832-  
493 1838). No correction was undertaken for the period 1829-1831.

494

$$495 \Delta T = 0.2861 \cdot a - 523.85 \quad (2)$$

496

#### 497 **4.5 Homogenisation of the monthly mean temperature.**

498 Esmark observed only three times a day, so it is far from obvious how monthly mean  
499 temperature should be calculated without bias. This problem confronts meteorological  
500 institutes worldwide so formulas for such calculations have been developed (see Appendix C).  
501 The formulas contain specific constants valid for each month and site. Strictly speaking the  
502 constants were unknown for Esmark’s observation site at Øvre Vollgate, but are well known  
503 for the station 18700 Oslo – Blindern, situated 3.4 km to the north of Esmark’s site.  
504 Fortunately there are indications that the constants for Blindern could be used also for Øvre  
505 Vollgate (see Appendix C). Given the constants the calculation of homogenous monthly mean  
506 temperature was trivial when the homogenised version of the observations at fixed hours was



507 used. We found that the corrections for seasonal means vary from 0.0°C to +0.4°C, the annual  
508 corrections from 0.0°C to +0.3°C. How the corrections changed throughout the period of  
509 observation are shown in Fig. 7. For the period 1822.12-1831.12 no corrections were applied.

#### 510 **4.6 The Christiania (Oslo) climate in Esmark's period of observation, 1816-1838**

511 Esmark's observations exhibit a long-term variation pattern characterised by lower values in  
512 the start and in the end of the period, whereas the middle of the period was somewhat warmer,  
513 cf. Fig. 8. This is true not only for the annual means, but also for all seasons of the year except  
514 for winter. For individual years 1822 is warmest except in summer and autumn. The coldest  
515 year is 1838 followed by the years 1816, 1829 and 1820.

516

517 The year 1816 is of particular interest as it has gone into history as “the year without  
518 summer”, with an average decrease in global temperatures often ascribed to volcanic activity,  
519 resulting in a food shortage many places in the Northern Hemisphere. However, Esmark's  
520 observations show that this summer (JJA) was not extraordinary in Oslo, as the following  
521 summer of 1817 and 1821 were approximately 1°C colder. The spring temperature in 1816 is  
522 however the coldest one in the series. The three first years of Esmark's series must have been  
523 very unfavourable for agriculture due to low temperature. In the grain growing months  
524 (AMJJA) the mean temperature was about 10°C for the three consecutive years 1816, 1817  
525 and 1818, i.e. the lowest temperatures in Esmark series of observation.

## 526 **5 Discussion**

527

### 528 **5.1 Overheating of the midday observation?**

529 The midday observation turned out to be homogenous, but it may have been overheated by  
530 insufficient radiation protection in Esmark's yard or simply the confined space allowing less  
531 air flow (wind). This was tested by comparison with the Oslo – Blindern station (18700),  
532 which is well protected by a Stevenson screen. Differences between the midday observation  
533 and the evening observation exhibit characteristic variations throughout the year, not only for  
534 Blindern, but also for the Esmark series and the Oslo II series (Astronomical Observatory,  
535 18651), cf. station list Table 1 and Fig. 9. Whereas the differences between the Blindern series  
536 and Esmark's series were relatively small in the months August – April, they are much larger  
537 in the months May – July, when the sun is highest on the sky and the radiation reaches its  
538 annual maximum. Therefore one possible interpretation is that Esmark's thermometer was

539 overheated at the midday observation in midsummer, MJJ, by (reflected) short wave radiation.  
540 However, when compared to the diurnal pattern at the Oslo II station (Astronomical  
541 Observatory), it is seen that the curve representing Esmark's observations quite closely  
542 follows the Oslo II curve, also in midsummer, Fig 9. At the Astronomical observatory there  
543 were three thermometers on different walls – N, E and W. (Nordli et al. 2015). At least one of  
544 these thermometers was in shadow and therefore available for use at every observation time.  
545 This is our main reason for not correcting for a possible overheating of Esmark's midday  
546 observation, see also the following 5.2 and 5.3. The deviation of the Blindern station may be  
547 due to this site being more exposed to wind chill and its situation significantly higher above  
548 sea level than Esmark's house and the Astronomical Observatory, cf. Table 1.

549

550 The meteorological observations at the Astronomical Observatory started in April 1837  
551 (Nordli et al., 2015), so this series overlaps Esmark's series by 21 months. The difference of  
552 their uncorrected monthly means is shown in Fig. 10. It is evident that for all seasons but  
553 winter Esmark's temperatures are somewhat lower than those from the Observatory. Esmark  
554 died on 26 January 1839 (see Metadata), so possibly the quality of the latest months of his  
555 series might be questioned. However, we cannot see any decline in quality directly from his  
556 observation protocols. This is relevant also for the discussion of a possible correction of  
557 Esmark's midday observation due to overheating. If Esmark's midday observation had been  
558 corrected the discrepancy between Esmark's series and Observatory series would have been  
559 larger.

560

## 561 **5.2 Comparison with Hansteen's observations at the street Pilestredet in Oslo**

562 During the period 1822.11-1827.02 the Christiania professor Christopher Hansteen carried  
563 out observations at his home in Pilestredet at the corner of Keysersgate, at the center of town  
564 (Hansteen 1823, 1824, 1828; Birkeland, 1926: 12), cf Table 1 for some further information.

565 The distance from Esmark's site was only about 600 m. Hansteen's observation times varied  
566 much but for each month he gives the observation times together with the data (Hansteen,  
567 1824). The distribution of the observation times in UTC is as follows: morning 06<sup>h</sup> 4%, 07<sup>h</sup>  
568 44%, 08<sup>h</sup> 52%; midday 13<sup>h</sup> 20%, 14<sup>h</sup> 78%, 15<sup>h</sup> 2%; evening 21<sup>h</sup> 6%, 22<sup>h</sup> 88%, 23<sup>h</sup> 6%.

569 Hansteen's observations were corrected to Esmark's observation times, approximately 08, 15  
570 and 21 UTC by use of the mean daily temperature wave at Blindern so that Esmark's  
571 observations could be compared with the corrected ones of Hansteen, Fig 11. It is seen that  
572 Hansteen's morning observation is much warmer than that of Esmark except during winter.

573 Most likely the thermometers of Hansteen had been overheated as they were hanging at the  
574 southern and northern side of the house (Birkeland, 1925: 12). Then it must have been  
575 difficult to find shadow in the morning. Also the midday observation is warmer at Hansteen's  
576 site than by Esmark. This is probably due to the fact that Hansteen's garden was protected by  
577 the surrounding houses and gardens of the town which reduced wind, while Esmark's garden  
578 was directly exposed to the winds from the adjacent bay. The evening temperatures at  
579 Hansteens house, however, agrees well with those from Esmark during summer unlike for the  
580 two other observation times. The evening observations occurred after sunset at both sites,  
581 whereas the two other observations occurred after sunrise.

582  
583 Unlike the situation during summer, Hansteen's temperatures are lower than those of Esmark  
584 in the period November – March (Fig. 11). In many weather situations the air loses energy by  
585 long wave radiation because the short wave radiation is too small to compensate for the loss.  
586 The result is that the coldest air is found at the lowest places in the local terrain, not  
587 necessarily at the lowest sites above sea level. Esmark's house lies high in the local terrain at  
588 the edge of a slope down to Pipervika cf. Metadata, whereas Hansteen's house lies low in the  
589 local terrain at a floor of a small valley. The difference in winter temperature is therefore  
590 possibly an effect of topography.

591

### 592 **5.3 Comparison with Stockholm and Copenhagen**

593 The Stockholm and Copenhagen series were not used as reference stations for the  
594 homogeneity testing. Their distances from Oslo were considered to be too long, 350 km and  
595 450 km respectively. However, comparison with the Stockholm Observatory and Copenhagen  
596 old Botanical Garden (Closter et al. 2006) with Esmark's observations may provide some  
597 indications of the quality of the homogenisation, see Fig 12. Compared to Esmark Stockholm  
598 seems to be relatively warmer in the first four years, 1816-19, than the rest of the series.

599 Without correction for the years 1816-21 the differences would have been even larger.

600 Therefore comparison with Stockholm supports the correction of the series. Probably there  
601 might be another shift in the series in 1819. Some support for this is seen in the homogeneity  
602 testing cf. Table 2, part 2. However, the reason might also be spatial temperature differences  
603 between Stockholm and Oslo, the long distance between the stations taken into account. And,  
604 in spite of homogenisation there might also be small inhomogeneities in the Stockholm series.  
605 Comparison between Copenhagen and Oslo give no reason for expecting any shift in the  
606 series, but four years is missing from the Botanical Garden series

607

#### 608 **5.4 The summer of 1816 in Christiania (Oslo)**

609 Several volcanic eruptions affected global climate in the first years of Esmark's period of  
610 observation, the Tambora eruption in Asia in 1815 being the largest in terms of sulphur mass  
611 ejected and general impact (Stothers 1984, Oppenheimer, 2003). It has given rise to the  
612 paradigm for 1816: "the year without a summer". Esmark's observations show, however, that  
613 the summer of 1816, though cold, was not extraordinary cold in Oslo. And in Stockholm  
614 ("Bolin Centre Database,") that summer was rather warm, No 17 of the 23 summers from  
615 1816-1838, ranked from low to high (Table 6). May, however, was very cold in both cities,  
616 and July quite warm in both cities, but in June and August Oslo was much colder relative to  
617 the mean value than Stockholm.

618

619 Esmark's observations may also be compared to other independent reconstructions of  
620 temperature in Norway in the period 1816-1838 (Table 7). One reconstruction for FMA for  
621 Austlandet, South Eastern Norway, is based upon ice loss mainly from Lake Randsfjorden  
622 (Nordli et al., 2007). Four reconstructions are based upon the first date of grain harvest:  
623 Austlandet (Nordli, 2001a), Vestlandet (Bergen), Western Norway, (Nordli et al., 2003),  
624 Lesja (Nordli, 2001b) and Trøndelag, Mid Norway (Nordli, 2004). The grain harvest date is a  
625 proxy for AMJJA temperature in the southern lowland areas, whereas in the mountain valleys  
626 (Lesja) and northern areas (Trøndelag) it is a proxy for MJJA temperatures. We also included  
627 a gridded multi proxy series for the nearest grid point to Oslo (Luterbacher et al. 2004). The  
628 three reconstructions for Austlandet all have the spring-summer of 1816 as the coldest one in  
629 the period, whereas in the Esmark series it is listed as No. 3. The reconstructions for the two  
630 other temperature regions, Vestlandet and Trøndelag, show a very different picture with  
631 relatively warm 1816 summers like the summer in Stockholm based on instrumental  
632 observations. Vestlandet and Trøndelag belong to other climate regions than Austlandet  
633 (Hanssen-Bauer and Førland, 2000), so for a specific summer it might reflect real temperature  
634 differences. The very low temperature for spring in 1816 seems to have had a strong influence  
635 on agriculture so the harvest had been delayed in south eastern Norway. This is reflected in  
636 the AMJJA temperature reconstruction. In Fig. 13 proxy and instrumental summer  
637 temperatures (JJA) are shown for the whole period of Esmark's observations. The proxy data  
638 of Oslo (Luterbacher et al. 2004) agree with the homogenised Esmark's series that the three  
639 summers 1816-18 were quite cold, not warm like those in Stockholm. The summer of 1819,

640 however, was warm in Oslo (and also in Stockholm) but not in the reconstruction. It is also  
641 evident that the variability in the reconstructed series is too small.

642

643 The summer temperatures of 1816 have recently been analysed by Luterbacher and Pfister  
644 (2015). Their study shows a positive gradient from a cold core of air lying over France with a  
645 positive temperature gradient towards Eastern and Northern Europe, so the paradigm of the  
646 severe summer of 1816 has to be modified when it comes to Scandinavia and Eastern Europe  
647 to take into account significant geographical variation. The authors state that “in eastern  
648 Europe, western Russia and parts of eastern Scandinavia, summer temperatures were normal  
649 or slightly warmer than average”.

## 650 **6 Conclusions**

651 Homogeneity testing (SNHT) of Esmark’s temperature observations 1816-1838 in Christiania  
652 (Oslo) demonstrated three significant shifts, and we propose corrections for these. First there  
653 is a shift in the evening observation in 1821-22. Before the shift the evening observation was  
654 corrected by about +1.3° for the summer months, but only by about +0.5°C in winter.

655 A very large shift in the morning temperature was detected in 1827-28. From Esmark himself  
656 we know that he used a “night thermometer” in 1833, identified as minimum thermometer.

657 This change of instrumentation explains the lower values for the morning observation. During  
658 the years 1831 to 1838 the nightly minimum temperature decreased steadily in the winter  
659 season, i.e. it was inhomogenous. The reason seems to be later and later reading of the  
660 minimum temperature in the morning. The seasonal corrections of the series are less than  
661 0.5°C, and for annual means less than 0.4°C. In the time interval 1822-1831 no corrections are  
662 applied. The homogenized temperature series 1816-1838 exhibit low temperature at both  
663 ends, with higher temperature in the middle, i.e. in the 1820s. The starting year, 1816, is of  
664 particular interest as it has been referred to as ‘the year without a summer’. That summer in  
665 Oslo was cold, but not extraordinary cold, as it was only the fifth coldest in the period of  
666 observation. However, March and May that year were the coldest ones in the period of  
667 Esmark’s data, and 1816 and 1838 had the lowest annual means. The first three years of  
668 Esmark’s observation, 1816-1818, were particularly cold in the grain growing season, April-  
669 August, and lends support to the historians’ view that these were years of hardship and  
670 famine.

671

672 **REFERENCES**

- 673 Alexandersson, H., 1986. A homogeneity test applied to precipitation data. *J. Climatol.* 6,  
674 661–675. doi:10.1002/joc.3370060607
- 675 Alexandersson, H., Moberg, A., 1997. Homogenization of Swedish Temperature Data. Part I:  
676 Homogeneity Test for Linear Trends. *Int. J. Climatol.* 17, 25–34.  
677 doi:10.1002/(SICI)1097-0088(199701)17:1<25::AID-JOC103>3.0.CO;2-J
- 678 Andersen, B. G. 1992. Jens Esmark – a pioneer in glacial geology. *Boreas* 21: 97-  
679 102.
- 680 Anonymous 1839. Biografi öfver Jens Esmark, Professor i Bergvetenskapen vid Universitetet  
681 i Christiania, Riddar af Kongl. Wasa-Orden. Kgl. [svenska] Vetenskaps-Akademien,  
682 Nya Handlingar 1838: 312-323. [The biography was written by Esmark's son Hans  
683 Morten Thrane Esmark & Jøns Jacob Berzelius]
- 684 Auer, I., Böhm, R., Jurkovic, A., Lipa, W., Orlik, A., Potzmann, R., Schöner, W.,  
685 Ungersböck, M., Matulla, C., Briffa, K., Jones, P., Efthymiadis, D., Brunetti, M.,  
686 Nanni, T., Maugeri, M., Mercalli, L., Mestre, O., Moisselin, J.-M., Begert, M., Müller-  
687 Westermeier, G., Kveton, V., Bochnicek, O., Stastny, P., Lapin, M., Szalai, S.,  
688 Szentimrey, T., Cegnar, T., Dolinar, M., Gajic-Capka, M., Zaninovic, K., Majstorovic,  
689 Z., Nieplova, E., 2007. HISTALP—historical instrumental climatological surface time  
690 series of the Greater Alpine Region. *Int. J. Climatol.* 27, 17–46. doi:10.1002/joc.1377
- 691 Berger, A., 2012. A Brief History of the Astronomical Theories of Paleoclimates. Pp. 107-  
692 129. In : A. Berger (ed.) *Climate Change*. Wien : Springer Verlag. 10.1007/978-3-  
693 7091-0973-1\_8
- 694 Bergström, H., Moberg, A., 2002. Daily Air Temperature and Pressure Series for Uppsala (1722–  
695 1998). *Clim. Change* 53, 213–252. doi:10.1023/A:1014983229213.
- 696 Birkeland, B. J., 1925. Äldre Meteorologiske Beobachtungen in Oslo (Kristiania). Luftdruck  
697 und Temperatur in 100 Jahren. (Old meteorological observations in Oslo. One hundred  
698 years of air pressure and temperature). (submitted 1923). *Geofys. Publ.* III, 56 pp.
- 699 Bolin Centre Database [WWW Document], n.d. URL  
700 [http://bolin.su.se/data/stockholm/homogenized\\_monthly\\_mean\\_temperatures.php](http://bolin.su.se/data/stockholm/homogenized_monthly_mean_temperatures.php)  
701 (accessed 02.10.16).
- 702 Closter, A.M., Closter, R.M., Cappelen, J., Christensen, J.H., Christoffersen, K.,  
703 Kern-Hansen, C., 2006. Temperature measurements in Copenhagen from  
704 1767 to 1860 (Technical report No. 06–13). Danish Meteorological Institute.  
705 Data: <http://www.dmi.dk> (accessed 09.02.16)

706 Document 1. Riksarkivet (National Archive), Oslo, Christiania Byfogden A  
707 Tinglysning, Tinglysninger frem til 1819, property No. 308. Sold to JE 19  
708 August 1815.

709 Document 2. Riksarkivet (National Archive), Oslo, B VII 1 Kristiania Magistrat  
710 Fa – Folketellinger 0001 (1815); Ga – Manntall 0004 (1816), 0005 (1826,  
711 1828), 0006 (1829, 1830), 0007 (1831, 1833), 0008 (1834), 0009 (1835,  
712 1836), 0010 (1837); Kristiania Magistrat skatter Gc.

713 Document 3. Oslo Byarkiv (Oslo City Archive), Christiania  
714 matrikuleringsprotokoll, 1830, page 142. Document available as PDF at Oslo  
715 Kommune (Oslo municipality), Plan og bygningsetaten.

716 Document 4. Oslo Kommune (Oslo municipality), Plan og bygningsetaten, 1938,  
717 Journal No. 1768/1938 Riving av (demolition of) Øvre Vollgt. 7. Document  
718 copy available on fiche.

719 Document 5. Oslo Byarkiv (Oslo City Archive), Christiania  
720 matrikuleringsprotokoll, 1830, pp. 141, 142, 143 & 163. Documents  
721 available as PDF at Oslo Kommune (Oslo municipality), Plan og  
722 bygningsetaten.

723 Document 6. Landarkivet (County Archive), Fyn, Denmark. Stamhuset  
724 Hofmangsgaves Arkiv. J. Esmark, letter to Nils Hofman Bang 31 October  
725 1823. Thanks for fruit trees which are now all planted in his garden.

726 Ducré-Robitaille, J.-F., Vincent, L.A., Boulet, G., 2003. Comparison of techniques  
727 for detection of discontinuities in temperature series. *Int. J. Climatol.* 23,  
728 1087–1101. doi:10.1002/joc.924

729 Esmark, J. 1799-1810. Esmark's handwritten observation protocols from  
730 Kongsberg. 11 volumes (1802 missing). Riksarkivet (National Archive),  
731 Oslo. S-1570. Det norske meteorologiske institutt. F/Fa. Materiale etter  
732 professorer. L0001. Esmark's Kongsberg protocols.

733 Esmark, J. "1802". [1803] Auszug aus einem Schreiben des Oberbergamts-  
734 Assessor J. Esmarck zu Kongsberg über die Schnee- und Vegetations-linie in  
735 Norwegen. *Nordisches Archiv für Natur- und Artzneywissenschaft und*  
736 *Chirurgie* III (3): 197-200. Copenhagen.

737 Esmark, J. 1812. Bemærkninger, gjorte paa en Reise til Gousta-Fjeldet i Øvre-  
738 Tellemarken. Dated Kongsberg 29 December 1810. Topographisk-Statistiske

739 Samlinger. Udgivne af Det Kongelige Selskab for Norges Vel. Første Deels  
740 Andet Bind. Christiania. W. Wulfsberg. pp. 175-196.

741 Esmark, J. 1816-1838. Esmark's original handwritten observation protocols from  
742 Christiania. 23 volumes. Riksarkivet (National archives), Oslo. S-1570. Det  
743 norske meteorologiske institutt. F/Fa. Materiale etter professorer. L0002.  
744 Esmark's Christiania protocols.

745 Esmark, J. 1820. Et nyt Hygrometer. Den Norske Rigestidende, No. 84 (20  
746 October).

747 Esmark, J. 1823. Middel-Barometerstand og Middel-Temperatur for Christiania i  
748 de syv Aar fra 1816 til 1822. Magazin for Naturvidenskaberne. (Første  
749 Aargangs første Bind) [1]: [p. 178 – unpaginated table at end of volume].

750 Esmark, J. 1824. Bidrag til vor Jordklodes Historie. Magazin for  
751 Naturvidenskaberne. (Anden Aargangs første Bind, Første Hefte) [3]: 28-49.

752 Esmark, J. 1825. Handwritten eight-page vitae/autobiography, Christiania 15  
753 October 1825. Kungliga Vetenskapsakademien - Royal Swedish Academy of  
754 Science, Stockholm, Center for the History of Science, Archives, category  
755 "Inkommande skrivelser från personer utan eget arkiv".

756 Esmark, J. 1826 Remarks tending to explain the Geological History of the Earth.  
757 The Edinburgh New Philosophical Journal 2: 107-121.

758 Esmark, J. 1833. Thermometer- og Barometer-Stand i Christiania efter 16325  
759 Observationer i 15 år. Eyr: et medicinsk Tidsskrift 8 : 235-239. Christiania.

760 Fagan, B., 2001. The Little Ice Age: How Climate Made History 1300-1850, 1  
761 edition. ed. Basic Books.

762 [Fearnley, C.] 1865. Meteorologische Beobachtungen an der Königlichen Universitäts-  
763 Sternwarte zu Christiania. 1837-1863. Christiania: H. J. Jensen.

764 Gjelten, H.M., Nordli, Ø., Grimenes, A.A., Lundstad, E., 2014. The Ås Temperature Series in  
765 Southern Norway—Homogeneity Testing And Climate Analysis. Bull. Geogr. Phys.  
766 Geogr. Ser. 7, 7–26. doi:10.2478/bgeo-2014-0001

767 Hanssen-Bauer, I., and E. Førland, E. 2000: Temperature and precipitation variations in  
768 Norway 1900 – 1994 and their links to atmospheric circulation. Int. J. Climatol. 20,  
769 1693 – 1708.

770 Hansteen, C. 1823. Meteorologisk Dagbog for den sidste Fjerdedeel af 1822.  
771 Magazin for Naturvidenskaberne. Første Aargangs første Bind, 1. Hefte, [p.  
772 177 – unpaginated table at end of volume].



773 Hansteen, C. 1824. Foreløbige Resultater af Barometer-Iagttagelser i Christiania.  
774 Magazin for Naturvidenskaberne. (Anden Aargang 2 Hefte) [4]: 269-298.

775 Hansteen, C. 1828. Timevise Thermometer- og Barometer-Iagttagelser i  
776 Trondhjem. Magazin for Naturvidenskaberne 8 (1): 173.

777 Hansteen, C. 1841. Resultaterne af tre Aars Barometer-Iagttagelser i Christiania.  
778 In: Forhandlinger ved de skandinaviske Naturforskeres andet Möde, der  
779 holdtes i Kjöbenhavn fra den 3die til den 9de Juli 1840. Kjöbenhavn: I  
780 Commission hos Universitetsboghandler C.A. Reitzel. pp. 52-64.

781 Hestmark, G. 2009. ”Her ligger Sneen evig.” Da Dovre falt – for Esmarks  
782 barometer. Historisk Tidsskrift 88: 231-249.

783 Horrebow, P. 1780. Tractatus historico-meteorologicus. Havnæ.

784 Kratzenstein, C. G. 1791. Forelæsninger over Experimental-Physiken.  
785 Kiöbenhavn: Trygt hos Johan Frederik Schultz. Hos Faber og Nitsche.

786 Krüger, T. 2013. Discovering the Ice Ages: International Reception and  
787 Consequences for a Historical Understanding of Climate. (History and  
788 Medicine Library 37). Leiden: Brill, 2013.

789 Luterbacher, J. and Pfister, C. 2015. The year without a summer. Nature  
790 Geoscience 8: 246-248.

791 Luterbacher, J., Dietrich, D., Xoplaki, E., Grosjean, M. and Wanner, H., 2004:  
792 European seasonal and annual temperature variability, trends and extremes  
793 since 1500. *Science* **303**, 1499-1503.  
794 Data: <https://crudata.uea.ac.uk/cru/projects/soap/data/recon/>

795 Livingstone, J. 1819. Account of an improved Hygrometer. The Edinburgh  
796 Philosophical Journal 1: 116-117.

797 Middleton, W. E. K. 1966. A History of the Thermometer and Its Uses In  
798 Meteorology. Baltimore, Johns Hopkins Press.

799 Moberg, A., Alexandersson, H., 1997. Homogenization of Swedish Temperature Data. Part II:  
800 Homogenized Gridded Air Temperature Compared with a Subset of Global Gridded Air  
801 Temperature Since 1861. *Int. J. Climatol.* 17, 35–54. doi:10.1002/(SICI)1097-  
802 0088(199701)17:1

803 Moberg, A., Bergström, H., Krigsman, J. R. & Svanered, O. 2002. Daily air temperature and  
804 pressure series for Stockholm (1756-1998). *Climatic Change* 53: 171-212.

805 Myhre, J. E. 1990. Oslo Bys Historie. Vol. 3. Hovedstaden Christiania. Fra 1814  
806 til 1900 . Oslo: J. W. Cappelén.

807 Nordli, Ø., 2001a. Spring and summer temperatures in south eastern Norway (1749 – 2000)  
808 (DNMI-klima No. 01/2001). Nordli, Ø., 2001b. Reconstruction of Nineteenth Century  
809 Summer Temperatures in Norway by Proxy Data from Farmers' Diaries. *Clim. Change*  
810 48, 201–218.

811 Nordli, Ø., 2004. Spring and summer temperatures in Trøndelag 1701 – 2003 (met.no/report  
812 No. 05/2004). Meteorological Institute, Oslo.

813 Nordli, Ø., Hestmark, G., Benestad, R.E., and Isaksen, K., 2015. The Oslo temperature series  
814 1837–2012: homogeneity testing and temperature analysis. *Int. J. Climatol.* 35, 3486–  
815 3504. doi:10.1002/joc.4223

816 Nordli, Ø., Lie, Ø., Nesje, A., and Dahl, S.O., 2003. Spring–summer temperature  
817 reconstruction in western Norway 1734–2003: a data-synthesis approach. *Int. J.*  
818 *Climatol.* 23, 1821–1841. doi:10.1002/joc.980

819 Nordli, Ø., Lundstaf, E., and Ogilvie, A.E.J., 2007. A Late Winter-Early Spring Temperature  
820 Reconstruction for Southeastern Norway from 1758 to 2006. *???* 46, 404–  
821 408. doi:10.1023/A:1005698302572

822 Oppenheimer, C., 2003. Climatic, environmental and human consequences of the largest  
823 known historic eruption: Tambora volcano (Indonesia) 1815. *Progress in physical*  
824 *geography* 27.2: 230-259.

825 Rudwick, M. J. S. 2008. *Worlds Before Adam. The Reconstruction of Geohistory in the Age*  
826 *of Reform.* Chicago & London: The University of Chicago Press.

827 Snorrason, E. 1974. *C. G. Kratzenstein: professor physices experimentalis Petropol. et Havn.*  
828 *and his Studies on electricity during the eighteenth century. Acta historica scientiarum*  
829 *naturalium et medicinalium no. 29 / edidit Bibliotheca Universitatis Hauniensis.* Odense:  
830 Odense University Press.

831 Splinter, Susan 2007. *Zwischen Nützlichkeit und Nachahmung. Eine Biografie des Gelehrten*  
832 *Christian Gottlieb Kratzenstein (1723–1795).* Frankfurt (Main): Peter Lang.

833 Stothers, R. B. 1984. The Great Tambora Eruption in 1815 and Its Aftermath. *Science* 224  
834 (4654): 1191-1198. Doi: 10.1126/science.224.4654.1191.

835 Tuomenvirta, H., 2001. Homogeneity adjustments of temperature and precipitation series—  
836 Finnish and Nordic data. *Int. J. Climatol.* 21, 495–506. doi:10.1002/joc.616

837 Willaume-Jantzen, V. 1896. *Meteorologiske Observationer i Kjøbenhavn. Résumé des*  
838 *Observations Météorologiques de Copenhague.* Det Danske Meteorologiske Institut.  
839 Kjøbenhavn, i commission hos universitets-boghandler G.E.C. Gad.

840 Worsley, P. 2006. Jens Esmark, Vassryggen and early glacial theory in Britain. *Mercian*  
841 *Geologist* 16: 161-172.  
842

843 **APPENDIX A. ESMARK'S METEOROLOGICAL TABLES IN**

844 ***DEN NORSKE RIGSTIDENDE.***

845

846 Esmark, J. 1818/19. Meteorologiske Iagttagelser i Christiania 1818, anstillede af  
847 Prof. Esmark. *Den Norske Rigstidende* 1818, No. 7 (24 January); No. 10 (4  
848 February); No. 14 (18 February); No. 18 (4 March); No. 23 (21 March), No.  
849 28 (8 April), No. 32 (22 April); No. 37 (9 May); No. 40 (20 May), No. 45 (6  
850 June), No. 49 (20 June), No. 54 (8 July); No. 59 (25 July); No. 63 (8  
851 August); No. 67 (21 August); No. 71 (5 September); No. 83, (17 October);  
852 No. 84 (21 October), No. 86 (28 October); No. 88 (4 November); No. 95 (28  
853 November); No. 98 (9 December); No. 102 (23 December); No. 3 (8 January  
854 1819).

855 Esmark, J. 1819/20. Meteorologiske Iagttagelser i Christiania 1819, anstillede af  
856 Prof. Esmark. *Den Norske Rigstidende* No. 6 (19 January); No. 11 (5  
857 February); No. 16 (23 February); No. 19 (5 March); No. 24 (23 March); No.  
858 26 (6 April); No. 33 (23 April); No. 36 (4 May); No. 41 (21 May); No. 48  
859 (15 June); No. 49 (18 June); No. 54 (6 July); No. 62 (3 August); No. 65 (13  
860 August); No. 67 (20 August); No. 78 (28 September); No. 79 (1 October)  
861 No. 82 (12 October); No. 84 (19 October); No. 89 (5 November); No. 95 (26  
862 November); No. 99 (10 December); No. 103 (24 December); No. 2 (7  
863 January 1820).

864 Esmark, J. 1820/21. Meteorologiske Iagttagelser i Christiania 1820, anstillede af  
865 Prof. Esmark. *Den Norske Rigstidende*, No. 7 (25 January); No. 11 (8  
866 February), No. 14 (18 February); No. 18 (3 March); No. 24 (24 March) ; No.  
867 28 (7 April); No. 32 (21 April); No. 37 (9 May); No. 41 (23 May); No. 47  
868 (13 June); No. 50 (23 June); No. 54 (7 July); No. 58 (21 July); No. 63 (8  
869 August); No. 68 (25 August); No. 72 (8 September); No. 77 (26 September);  
870 No. 81 (10 October); No. 85 (24 October); No. 88 (3 November); No. 94 (24  
871 November); No. 98 (8 December); No. 103 (26 December); No. 3 (9 January  
872 1821).

873 Esmark, J. 1821/22. Meteorologiske Iagttagelser i Christiania 1821, anstillede af  
874 Professor Esmark. *Den Norske Rigstidende*, No. 7 (23 January), står bare  
875 snee, men ikke mengde, ; No. 11 (6 February); No. 16 (23 February); No. 21  
876 (13 March); No. 23 (20 March); No. 29 (10 April); No. 33 (24 April), No. 38

877 (11 May); No. 41 (22 May); No. 45 (5 June); No. 52 (29 June); No. 55 (10  
878 July); No. 58 (20 July); No. 63 (6 August); No. 68 (24 August); No. 72 (7  
879 September); No. 76 (21 September); No. 80 (5 October); No. 85 (22  
880 October); No. 89 (5 November); No. 93 (19 November)(nytt moderne  
881 plusstegn); No. 98 (7 December); No. 102 (21 December); No. 2 (7 January  
882 1822).

883 Esmark, Jens 1822/23. Meteorologiske Iagttagelser i Christiania 1822, anstillede  
884 ved Professor Esmark. *Den Norske Rigstidende*, No. 5 (18 January); No. 10  
885 (4 February); No. 15 (22 February); No. 18 (4 March); No. 23 (22 March);  
886 No. 28 (8 April); No. 32 (22 April); No. 36 (6 May); No. 42 (27 May); No.  
887 45 (7 June) not nedbørmåling; No. 50 (24 June); No. 81 (11 October); No. 82  
888 (14 October); No. 83 (18 October); No. 84 (21 October); No. 87 (1  
889 November); No. 89 (8 November); No. 90 (11 November); No. 92 (18  
890 November); No. 94 (25 November); No. 96 (2 December); No. 98 (9  
891 December); No. 102 (23 December); No. 2 (6 January 1823).

892 Esmark, J. 1823/24. Meteorologiske Iagttagelser i Christiania 1823, anstillede ved  
893 Professor Esmark. *Den Norske Rigstidende* No. 7 (24 January); No. 11 (7  
894 February) ; No. 15 (21 February); No. 20 (10 March); No. 24 (24 March);  
895 No. 27 (4 April); No. 31 (18 April); No. 36 (5 May); No. 40 (19 May); No.  
896 46 (9 June); No. 49 (20 June); No. 75 (19 September); No. 76 (22  
897 September); No. 77 (26 September); No. 78 (29 September); No. 79 (3  
898 October); No. 81 (10 October); No. 82 (13 October); No. 84 (20 October);  
899 No. 88 (3 November); No. 93 (21 November); No. 98 (8 December); No. 102  
900 (22 December); No. 2 (5 January 1824).

901 Esmark, J. 1824/25. Meteorologiske Iagttagelser i Christiania 1824, anstillede ved  
902 Professor Esmark. *Den Norske Rigstidende* No. 6 (19 January); No. 11 (5  
903 February); No. 15 (19 February); No. 20 (8 March); No. 24 (22 March); No.  
904 29 (8 April); No. 33 (22 April); No. 37 (6 May); No. 42 (24 May); No. 45 (3  
905 June); No. 50 (21 June); No. 54 (5 July); No. 59 (22 July); No. 64 (9  
906 August); No. 68 (23 August); No. 74 (13 September); No. 77 (23  
907 September); No. 80 (4 October); No. 86 (25 Oktober); No. 89 (4 November);  
908 No. 96 (29 November); No. 98 (6 December); No. 103 (23 December); No. 2  
909 (6 Januar 1825).

910 Esmark, J. 1825/26. Meteorologiske Iagttagelser i Christiania 1825, anstillede ved  
911 Professor Esmark. *Den Norske Rigstidende* No. 7 (24 January); No. 11 (7.  
912 February), No. 15 (21 February); No. 18 (3. March); No. 24 (24 March); No.  
913 29 (11 April); No. 33 (25 April); No. 36 (5 May); No. 40 (19 May); No. 45  
914 (6 June); No. 49 (20 June); No. 53 (4 July); No. 70 (1 September); No. 71 (5  
915 September); No. 73 (12 September); No. 74 (15. September); No. 76 (22  
916 September); No. 79 (3 October), No. 85 (24 October); No. 89 (7 November);  
917 No. 93 (21 November); No. 97 (5 December); No. 102 (22 December); No. 2  
918 (5 January 1826).

919 Esmark, J. 1826/27. Meteorologiske Iagttagelser i Christiania 1826, anstillede ved  
920 Professor Esmark. *Den Norske Rigstidende* No.8 (26 January); No. 12 (9  
921 February); No. 17 (27 February); No. 19 (6 March); No.23 (20 March); No.  
922 28 (6 April); No. 33 (24 April); No. 36 (4 May); No. 43 (29 May); No. 45 (5  
923 June); No. 50 (22 June); No. 55 (10 July): No.58 (20 July); No. 62 (3  
924 August); No. 67 (21 August); No. 72 (7 September); No. 77 (25 September);  
925 No. 80 (5 Oktober); No. 84 (19 October); No. 88 (2 November); No. 93 (20  
926 November); No. 97 (4 December); No. 102 (21 December); No. 2 (4 January  
927 1827).

928 Esmark, J. 1827/28. Meteorologiske Iagttagelser i Christiania 1827, anstillede ved  
929 Professor Esmark. *Den Norske Rigstidende* , No. 7 (22 January); No. 11 (5  
930 February); No. 16 (22 February); No. 19 (5 March); No. 24 (22 March); No.  
931 28 (5 April); No. 32 (19 April); No. 37 (7 May); No. 43 (28 May); No. 48  
932 (14 June); No. 50 (21 June); No. 54 (5 July); No. 58 (19 July); No. 79 (1  
933 October); No. 80 (4 October); No. 81 (8 October); No. 82 (11 October); No.  
934 83 (15 October); No. 84 (18 October); No. 89 (5 November); No. 94 (22  
935 November); No. 97 (3 December); 102 (20 December); No. 2 (7 January  
936 1828) – also sums up last ten years, compares with Stockholm, the coldest  
937 years have been 1819 and 1820, the mildest 1822 and 1826.

938 Esmark, J. 1828/29. Meteorologiske Iagttagelser i Christiania 1828, anstillede ved  
939 Professor Esmark. *Den Norske Rigstidende* , No. 6 (21 January); No. 10 (4  
940 February); No. 15 (21 February); No. 18 (3 March); No. 24 (24 March); No.  
941 27 (3 April – mange solpletter); No. 32 (21 April); No. 36 (5 May); No. 40  
942 (19 May); No. 45 (5 June); No. 49 (19 June); No. 53 (3 July); No. 59 (24  
943 July); No. 63 (7 August); No. 78 (29 September); No. 79 (2 October); No. 81

944 (9 October); No. 84 (20 October); No. 88 (3 November); No. 94 (24  
945 November); No. 98 (8 December); No. 102 (22 December); No.2 (5 January  
946 1829).

947 Esmark, J. 1829/30. Meteorologiske Iagttagelser i Christiania 1829, anstillede ved  
948 Professor Esmark. *Den Norske Rigstidende* , No. 8 (26 January); No. 11 (5  
949 February); No. 15 (19 February); No. 19 (5 March – den strengeste vinter på  
950 mange år); No. 24 (23 March); No. 27 (2 April); No. 33 (23 April); No. 37 (7  
951 May); No. 42 (25 May); No. 46 (8 June); No. 50 (22 June); No. 54 (6 July);  
952 No. 78 (28 September); No. 79 (30 September); No. 80 (5 October); No. 81  
953 (8 October); No. 85 (22 October); No. 87 (29 October); No. 89 (5  
954 November); No. 90 (9 November); No. 94 (23 November); No. 99 (10  
955 December); No. 103 (24 December); No. 2 (7 January 1830).

956 Esmark, J. 1830/31. Meteorologiske Iagttagelser i Christiania 1830, anstillede ved  
957 Professor Esmark. *Den Norske Rigstidende*, No. 7 (25 January); No. 11 (8  
958 February); No. 14 (18 February); No. 18 (4 March); No. 22 (18 March); No.  
959 27 (5 April); No. 31 (19 April); No. 36 (6 May); No. 40 (19 May); No. 46 (9  
960 June); No. 50 (23 June); No. 53 (5 July); No. 57 (19 July); No. 63 (9  
961 August); No. 70 (1 September); No. 73 (13 September); No. 78 (29  
962 Septmerber); No. 81 (11 October); No. 84 (21 October); No. 91 (15  
963 November); No. 95 (29 November); 98 (9 December); No. 102 (23  
964 December); No. 3 (10 January 1831).

965 Esmark, J. 1831/32. Meteorologiske Iagttagelser i Christiania 1831, anstillede ved  
966 Professor Esmark. *Den Norske Rigstidende* , No. 10 (3 February); No. 11 (7  
967 February); No. 17 (28 February); No. 20 (10 March); No. 25 (28 March); No.  
968 28 (7 April); No. 33 (25 April); No. 39 (12 May); No. 43 (22 May); No. 52  
969 (12 June); No. 57 (23 June); No. 63 (7 July); No. 70 (24 July); No. 75 (4  
970 August); No. 85 (28 August); No. 88 (4 September); No. 97 (25 September);  
971 No. 102 (10 October); No. 110 (3 November); No. 112 (10 November); No.  
972 118 (1 December); No. 119 (4 December); No. 1 (1 January 1832) ; No. 2 (5  
973 January 1832).

974 Esmark, J. 1832/33. Meteorologiske Iagttagelser i Christiania 1832, anstillede ved  
975 Professor Esmark. *Den Norske Rigstidende*, No.10 (2 February); No. 11 (5  
976 February); No. 19 (4 March); No. 20 (8 March); No. 26 (26 March); No. 30  
977 (12 April); No. 33 (22 April); No. 37 (6 May); No. 43 (20 May); No. 52 (10

978 Juni); No. 57 (21 Juni); No. 63 (5 July); No. 70 (22 July); No. 78 (9 August);  
979 No. 86 (28 August – usedvanlig kold sommer); No. 92 (11 September); No.  
980 98 (25 September); No. 103 (7 October); No. 108 (25 October); No. 111 (4  
981 November); No. 117 (25 November); No. 122 (13 december); No. 127 (30  
982 December); No. 4 (13 January 1833).

983 Esmark, J. 1833/34. Meteorologiske Iagttagelser i Christiania 1833, anstillede ved  
984 Professor Esmark. *Den Norske Rigstidende*, No.10 (3 February); No. 12 (10  
985 February); No. 18 (3 March); No. 24 (24 March); No. 25 (28 March); No. 30  
986 (14 April); No. 35 (2 May); No. 37 (9 May); No. 44 (26 May); No. 50 (9  
987 June); No. 58 (27 June); No. 63 (9 July); No. 77 (11 August); No. 80 (18  
988 August); No. 86 (1 September); No. 91 (12 September); No. 97 (26  
989 September); No. 103 (13 October); No. 105 (20 October); No. 110 (7  
990 November); No. 115 (24 November); No.120 (12 December); No. 123 (22  
991 December); No. 2 (5 January 1834).

992 Esmark, J. 1834/35. Meteorologiske Iagttagelser i Christiania 1834, anstillede ved  
993 Professor Esmark. *Den Norske Rigstidende* ,No. 7 (23 January); No. 10 (2  
994 February); No. 16 (23 February); No. 18 (2 March); No. 24 (23 March); No.  
995 27 (3 April); No. 32 (20 April); No. 37 (4 May); No. 43 (18 May); No. 53  
996 (10 June); No. 60 (26 June); No. 68 (15 July)(regnet som falt på en  
997 kvadratfods flate utgjorde 4 rhinlandskae tommer eller 576 kubikktommer);  
998 No. 71 (22 July); No. 79 (10 August), No. 83 (19 August); No. 90 (7  
999 September); No. 96 (21 September); No. 102 (5 October); No. 107 (23  
1000 October); No. 111 (6 November); No. 117 (27 November); No. 119 (4  
1001 December); No. 126 (28 December); No. 2 (8 January 1835).

1002 Esmark, J. 1835/36. Meteorologiske Iagttagelser i Christiania 1835, anstillede ved  
1003 Professor Esmark. *Den Norske Rigstidende*, No. 10 (1 February); No. 12 (8  
1004 February); No.15 (19 February); No. 20 (8 March); No. 24 (22 March); No.  
1005 28 (5 April); No. 34 (26 April); No. 40 (10 May); No. 50 (2 June); No. 54  
1006 (11 June); No. 58 (21 June); No. 65 (7 July); No. 72 (23 July); No. 79 (9  
1007 August); No. 88 (30 August); No. 91 (6 September); No. 99 (24 September);  
1008 No. 105 (11 October); No. 107 (18 October); No. 112 (5 November); No.  
1009 118 (26 November); No. 120 (3 December); No. 126 (24 December); No. 3  
1010 (10 January 1836).



- 1011 Esmark, J. 1836/37. Meteorologiske Iagttagelser i Christiania 1836, anstillede ved  
1012 Professor Esmark. *Den Norske Rigstidende*, No. 7 (24 January); No. 15 (21  
1013 February); No. 17 (28 February); No. 19 (6 March); No. 23 (20 March); No.  
1014 27 (3 April); No. 32 (21 April); No. 38 (5 May); No. 45 (22 May); No. 50 (2  
1015 June); No. 59 (23 June); No. 66 (10 July); No. 70 (19 July); No. 78 (7  
1016 August); No. 85 (23 August?) ; No. 92 (8 September); No. 98 (22  
1017 September); No. 105 (9 October); No. 111 (30 October); No. 112 (3  
1018 November); No. 119 (27 November); No. 125 (18 December); No. 126 (22  
1019 December); No. 3 (5 January 1837).
- 1020 Esmark, J. 1837/38. Meteorologiske Iagttagelser i Christiania 1837, anstillede ved  
1021 Professor Esmark. *Den Norske Rigstidende*, No. 10 (22 January); No. 17 (7  
1022 February); No. 22 (19 February); No. 22 (2 March); No. 34 (19 March); No  
1023 41 (4 April); No. 48 (20 April); No. 53 (2 May); No. 61 (21 May); No. 67 (4  
1024 June); No. 74 (20 June); No. 82 (9 July); No. 86 (18 July); No. 93 (3  
1025 August); No. 100 (20 August); No. 106 (3 September); No. 113 (19  
1026 September); No. 120 (5 October); No. 126 (19 October); No. 132 (2  
1027 November); No. 139 (19 November); No. 145 (3 December); No. 152 (19  
1028 December); No. 2 (4 January 1838).
- 1029 Esmark, J. 1838. Meteorologiske Iagttagelser i Christiania 1838, anstillede ved  
1030 Professor Esmark. *Den Norske Rigstidende*, No. 10 (18 January); No. 19 (3  
1031 February); No. 29 (20 February); No. 36 (4 March); No. 45 (20 March); No.  
1032 53 (3 April); No. 62 (19 April); No. 70 (3 May); No. 79 (19 May); No. 87 (2  
1033 June); No. 98 (19 June); No. 108 (4 Junly); No. 117 (19 July); No. 127 (2  
1034 August); No. 137 (19 August); No. 148 (6 September); No. 156 (20  
1035 September); No. 164 (4 October); No. 173 (20 October); No. 181 (3  
1036 November); No. 190 (18 November); No. 199 (4 December); No. 207 (18  
1037 December).
- 1038

1039 **Appendix B. Corrections of Esmark’s thermometer?**

1040 The corrections are very small for the frequent winter temperatures, but as high as 0.5°C for  
 1041 frequent summer temperatures. Due to the uncertainty with the identification of Esmark’s  
 1042 thermometer we have not applied these corrections to his observations. It should also be kept  
 1043 in mind that Esmark used another thermometer, i.e. a minimum thermometer for the period  
 1044 1828.03-1838.12, which might also have instrumental corrections. However, he was a skilled  
 1045 instrument builder, so it is not likely that he used thermometer with larger corrections than  
 1046 those in Table B1.

1047  
 1048 Table B1... Instrument correction (Corr) for thermometer readings (Temp.). The thermometer may  
 1049 have been used by Esmark, 1816-1838.

|            |       |       |       |       |       |       |        |        |        |
|------------|-------|-------|-------|-------|-------|-------|--------|--------|--------|
| Temp. (°C) | 25.00 | 18.75 | 12.50 | 6.25  | 0.00  | -6.25 | -12.50 | -18.75 | -25.00 |
| Corr. (°C) | +0.50 | +0.50 | +0.38 | +0.38 | +0.13 | +0.13 | +0.13  | +0.13  | +0.63  |

1050  
 1051

1052 **Appendix C**

1053 MET Norway calculates monthly mean temperatures for manual stations by Mohn’s (also  
 1054 called the C-formula) and Köppen’s formulas (Birkeland, 1936; Gjelten et al., 2014; Nordli et  
 1055 al., 2015), so we chose to use those formulas also for Esmark’s observations: The monthly  
 1056 mean temperature, T, may be calculated by Mohn’s formula and a modified Köppen’s  
 1057 formula, Table C1.

1058  
 1059 Table C1. Formulas for calculation of monthly mean temperature, T, where  $T_{08}$ ,  $T_{15}$  and  $T_{21}$ , are  
 1060 monthly means at observation times 08, 15 and 21 UTC respectively, and  $T_n$  is monthly mean night  
 1061 temperature,  $k_g$  and  $k_f$  are constants. Mohn’s formula is also often called the C-formula.

1062

|                  |                          |                                            |
|------------------|--------------------------|--------------------------------------------|
| Mohn’s formula   | $T = T_c + C$            | $T_c = \frac{T_{08} + T_{15} + T_{21}}{3}$ |
| Köppen’s formula | $T = T_f - k(T_f - T_n)$ | $T_f = \frac{T_{15} + T_{21}}{2}$          |

1063  
 1064 A “true” monthly mean temperature, T, may be calculated by the arithmetic mean of hourly  
 1065 observation according to definition, so for a station that have hourly observations the  
 1066 constants, C and  $k_f$ , are easily calculated by rearranging Mohn’s and Köppen’s formulas. For

1067 Esmark's series from Øvre Vollgate the constants were unknown. It was assumed that the  
1068 constants from Blindern could be used also for Øvre Vollgate. An indication of the robustness  
1069 of this assumption was tested by comparison with a short series of hourly observations from  
1070 the station 18815 Oslo – Bygdøy, 15 m a.s.l. The test procedure started with calculation of the  
1071 constants for the Blindern series based on the period 2012.12-2015.09. These constants were  
1072 then used for the calculation of mean monthly temperatures for Bygdøy for the same period,  
1073 which were compared with the “true” monthly means, i.e. those calculated by the hourly  
1074 observations. For Mohn's formula the deviation from the true means varied from  $-0.06^{\circ}\text{C}$  in  
1075 December to  $+0.31^{\circ}\text{C}$  in September that gave  $+0.10^{\circ}\text{C}$  for the whole year. For seven of the  
1076 months the deviation from the true value was less than  $\pm 0.1^{\circ}\text{C}$ . Corresponding figures for  
1077 Köppen's formula were  $-0.06^{\circ}\text{C}$  in July,  $+0.16^{\circ}\text{C}$  in September and  $+0.01^{\circ}\text{C}$  for the whole  
1078 year.  
1079

1080  
1081  
1082  
1083  
1084  
1085  
1086  
1087

**Tables**

Table 1. Esmark’s station at Øvre Vollgate 7 as well as other observation stations used in this article: national station number (identifier) and name, period of observation, station altitude and some additional information. The star before the start year marks the start of hourly observations. H<sub>s</sub> is m above sea level.

| No. and name               | Period (from-to; year, month, day) | H <sub>s</sub> (m) | Additional information    |
|----------------------------|------------------------------------|--------------------|---------------------------|
| 18651 Oslo II              | 1837.04.02-1933.12.31              | 25                 | Astronomical Observatory  |
| 18654 Oslo - Øvre Vollgate | 1816.01.01-1838.12.31              | 11                 | Esmark’s observations     |
| 18655 Oslo - Pilestredet   | 1822.10.19-1827.02.28              | 16                 | Hansteen’s observations   |
| 18700 Oslo - Blindern      | *1993.01.05 to present             | 94                 | Main building, MET Norway |
| 18815 Oslo - Bygdøy        | *2012.01.01 to present             | 15                 | Mainly rural station      |

1088  
1089  
1090  
1091  
1092  
1093  
1094  
1095  
1096

Table 2. The SNHT test used for comparison of temperatures at different observation times (I = morning, II = midday, and III = evening). Comparison of temperature at observation time x versus observation at time y (x vs y). The shifts are given by the last year of each part of the series. For the single shift test also the corrections needed for the x-series to be homogenous with y-series are given. It should be applied from the start year to the end year of the inhomogeneity (Non-significant results are given in italic).

| Part 1, 1816.01-1838.12: The whole length of the series |            |                   |                  |                   |                   |                   |
|---------------------------------------------------------|------------|-------------------|------------------|-------------------|-------------------|-------------------|
| SNHT tests                                              | Obs. times | Winter            | Spring           | Summer            | Autumn            | Year              |
| Single shift                                            | I vs II    | 1833; -1.1        | 1827; -2.1       | 1827; -3.3        | 1824; -1.4        | 1827; -1.8        |
| Single shift                                            | I vs III   | 1832; -1.5        | 1826; -2.8       | 1827; -4.0        | 1827; -1.7        | 1827; -2.4        |
| Single shift                                            | III vs II  | 1821; 0.7         | 1820; 1.5        | 1821; 1.3         | <i>1821; 0.6</i>  | 1821; 0.9         |
| Double shift                                            | I vs II    | 1826; 1834        | 1818; 1827       | 1817; 1827        | 1824; 1829        | 1823; 1827        |
| Double shift                                            | I vs III   | 1819; 1832        | 1820; 1826       | 1818; 1828        | 1823; 1829        | 1818; 1827        |
| Double shift                                            | III vs II  | <i>1821; 1832</i> | 1819; 1835       | 1821; 1835        | <i>1817; 1834</i> | 1821; 1835        |
| Part 2, 1816.01 – 1828.02                               |            |                   |                  |                   |                   |                   |
| SNHT-tests                                              | Obs. times | Winter            | Spring           | Summer            | Autumn            | Year              |
| Single shift                                            | II / I     | <i>1826; 0.8</i>  | <i>1818; 0.7</i> | <i>1817; 0.8</i>  | 1824; 1.0         | <i>1823; 0.5</i>  |
| Single shift                                            | I / III    | 1818; -1.0        | 1820; -1.7       | 1818; -1.7        | 1821; -0.9        | 1818; -1.3        |
| Single shift                                            | III / II   | <i>1821; -0.6</i> | 1819; -1.4       | <i>1821; -1.2</i> | <i>1817; -0.8</i> | 1821; -0.8        |
| Part 3, 1828.03 – 1838.12                               |            |                   |                  |                   |                   |                   |
| SNHT-tests                                              | Obs. times | Winter            | Spring           | Summer            | Autumn            | Year              |
| Single shift                                            | I / II     | 1834; -1.0        | <i>1834; 0.4</i> | <i>1830; -0.4</i> | <i>1829; -0.4</i> | <i>1830; -0.5</i> |

|              |          |            |            |            |            |            |
|--------------|----------|------------|------------|------------|------------|------------|
| Single shift | I / III  | 1832; -1.3 | 1836; -0.6 | 1836; -0.8 | 1829; -0.9 | 1836; -0.8 |
| Single shift | III / II | 1833; 0.4  | 1835; 0.8  | 1835; 0.9  | 1834; 0.6  | 1835; 0.7  |

1097

1098

1099 Table 3. The same as Table 1, but the single shift test used on monthly resolution. In the 1<sup>st</sup> and 3<sup>rd</sup>

1100 rows the years of the shifts are shown, and in the 2<sup>nd</sup> and 4<sup>th</sup> rows the adjustments. Period of

1101 observation 1816.01-1838.12.

|        | Jan  | Feb  | Mar  | Apr  | May  | Jun  | Jul  | Aug  | Sep  | Oct  | Nov  | Dec  |
|--------|------|------|------|------|------|------|------|------|------|------|------|------|
| I/II   | 1834 | 1826 | 1826 | 1830 | 1827 | 1827 | 1827 | 1827 | 1825 | 1827 | 1824 | 1833 |
|        | -1.2 | -1.4 | -1.0 | -2.2 | -3.3 | -3.4 | -3.5 | -2.9 | -1.9 | -1.1 | -1.5 | -1.2 |
| III/II | 1828 | 1832 | 1820 | 1819 | 1819 | 1826 | 1821 | 1821 | 1821 | 1820 | 1834 | 1820 |
|        | 0.6  | 0.7  | 1.1  | 1.7  | 1.8  | 1.3  | 1.3  | 1.3  | 0.8  | 0.9  | 0.6  | 0.7  |

1102

1103

1104 Table 4. Corrections (°C) of the evening observation during the period 1816.01-1821.12

| Jan | Feb | Mar | Apr | May | Jun | Jul | Aug | Sep | Oct | Nov | Dec |
|-----|-----|-----|-----|-----|-----|-----|-----|-----|-----|-----|-----|
| 0.6 | 0.6 | 1.0 | 1.2 | 1.3 | 1.2 | 1.3 | 1.3 | 0.9 | 0.8 | 0.3 | 0.5 |

1105

1106 Table 5. Difference, Diff (°C), of median temperature between Esmark's evening observations and the

1107 observations the following morning. For comparison the differences between the observation at 21

1108 UTC and the minimum temperature the following night are shown for the modern station Oslo –

1109 Blindern. The night is defined by the interval 21 - 08 UTC. STD (°C) = standard deviation for the

1110 differences.

|                 |      | Jan | Feb | Mar | Apr  | May  | Jun  | Jul  | Aug  | Sep | Oct | Nov | Dec |
|-----------------|------|-----|-----|-----|------|------|------|------|------|-----|-----|-----|-----|
| Esmark          | Diff | 0.0 | 0.0 | 0.0 | -0.7 | -1.8 | -1.6 | -1.3 | -1.2 | 0.0 | 0.5 | 0.0 | 0.0 |
| 1816.01-1821.12 | STD  | 3.4 | 2.6 | 2.4 | 2.1  | 2.4  | 2.3  | 2.6  | 2.1  | 2.1 | 2.0 | 2.6 | 2.2 |
| Esmark          | Diff | 0.9 | 0.7 | 1.2 | 0.6  | 0.6  | -0.7 | -0.6 | 0.0  | 1.2 | 0.6 | 0.8 | 0.6 |
| 1822.01-1828.02 | STD  | 3.1 | 2.5 | 2.3 | 1.8  | 2.2  | 2.4  | 2.2  | 2.1  | 2.9 | 2.5 | 2.5 | 2.4 |
| Esmark          | Diff | 1.3 | 1.5 | 1.9 | 2.2  | 3.1  | 3.1  | 3.1  | 3.1  | 2.5 | 1.9 | 1.6 | 1.3 |
| 1828.03-1838.12 | STD  | 2.6 | 2.3 | 2.5 | 1.8  | 2.1  | 2.2  | 2.4  | 2.3  | 2.2 | 2.1 | 1.9 | 2.7 |
| Blindern        | Diff | 1.0 | 1.5 | 2.3 | 2.6  | 3.2  | 3.0  | 2.7  | 2.4  | 2.0 | 1.5 | 1.0 | 1.0 |
| 1993.09-2015.09 | STD  | 1.7 | 1.8 | 1.8 | 1.7  | 1.8  | 1.8  | 1.7  | 1.6  | 1.6 | 1.6 | 1.5 | 1.6 |

1111

1112

1113 Table 6. The rank of mean temperature in 1816 for months and seasons during the years 1816-1838  
 1114 for Oslo (Esmark's observations). For comparison also Stockholm is included. The rank runs from low  
 1115 to high values, so that the lowest temp. is ranked no.1.

|           | J  | F | M | A | M | J  | J  | A | S  | O | N | D  | Yr | Wi | Sp | Su | Au |
|-----------|----|---|---|---|---|----|----|---|----|---|---|----|----|----|----|----|----|
| Oslo      | 14 | 6 | 1 | 5 | 1 | 7  | 13 | 3 | 2  | 3 | 8 | 11 | 2  |    | 1  | 5  | 2  |
| Stockholm | 14 | 3 | 6 | 9 | 1 | 16 | 18 | 9 | 13 | 5 | 8 | 12 | 7  | 6  | 4  | 17 | 3  |

1116

1117 Table 7. The rank of 1816-temperature for seasons during the period 1816-1838 for Oslo (Esmark's  
 1118 observations), and for climate reconstructions from proxy data at different places in Norway. For  
 1119 comparison also Stockholm is included. The rank runs from low to high values, so that the lowest  
 1120 temp. is ranked 1. The grid point (59.75°N, 10.75°E) differ only slightly from Esmark's house (59.91°N,  
 1121 10.74°E).

| Place, County                    | Feb-<br>Apr | Apr-<br>Aug | May-<br>Aug | Jun-<br>Aug | References              |
|----------------------------------|-------------|-------------|-------------|-------------|-------------------------|
| Oslo, South-eastern Norway       | 2           | 3           | 3           | 5           | Esmark's observations   |
| Austlandet, South-eastern Norway | 2           |             |             |             | Nordli et al. 2007      |
| Austlandet, South Eastern Norway |             | 1           |             |             | Nordli 2001a            |
| Lesja, South-eastern Norway      |             |             | 1           |             | Nordli 2001b            |
| Bergen, Western Norway           |             | 18          |             |             | Nordli et al. 2003      |
| Trøndelag, Mid Norway            |             |             | 18          |             | Nordli 2004             |
| Stockholm, Sweden                | 3           | 10          | 9           | 17          | Bolin Centre Database   |
| Grid point (59.75°N, 10°75E)     |             |             |             | 1           | Luterbacher et al. 2004 |

1122

1123

1124

1125 **Figure texts**

1126

1127 Fig. 1. Map of Christiania (now Oslo) 1811 with the location (red star) of  
1128 Esmark's house in Øvre Vollgt. 7 marked.

1129

1130 Fig. 2. Matriculation and survey 1830 of Esmark's property No. 308, Øvre Voldgate 7, in  
1131 Oslo Byarkiv (Oslo City Archive). Arrow indicates N. Garden to the left, house surrounding  
1132 back yard to the right.

1133

1134 Fig. 3. Street view of Esmark's house in Øvre Voldgate 7. Photograph from around 1900.  
1135 Oslo Bymuseum, No. OB.F00897. High buildings on each side built late 19<sup>th</sup> century.

1136

1137 Fig. 4. The January page from Esmark's meteorological observation protocol from  
1138 1823, the year he discovered ice ages. Now deposited at Riksarkivet (National  
1139 archives), Oslo. S-1570. Det norske meteorologiske institutt. F/Fa. Materiale etter  
1140 professorer. L0002.

1141

1142 Fig. 5. Esmark's first published Christiania weather table, from *Den norske*  
1143 *Rigstidende*, 24 January 1818. Maltese crosses are intended as + signs.

1144

1145 Fig. 6. The temperature difference (°C) between Esmark's evening observation and the  
1146 morning observation the following day for the winter season (Dec-Feb) in the period 1831-  
1147 1838.

1148

1149 Fig. 7. Corrections added to Esmark's series for each season during his period of observation,  
1150 1816-1838.

1151

1152 Fig. 8. Annual and seasonal means of Esmark's temperature series (symbols), and Gaussian  
1153 filter (curves) with standard deviation 3 in the Gaussian distribution (e.g. Nordli et al., 2015),  
1154 corresponding roughly to a 10 year rectangular filter.

1155

1156 Fig. 9. Temperature differences (°C) between the observations at 15 UTC and at 21 UTC for  
1157 the following stations: Oslo - Blindern for the period 1993.01-2015.09, Esmark 1816.01-  
1158 1838.12. (The corrections of the evening observations, Table 4, are added to the data for the  
1159 period 1816.01-1821.12 before the calculation of the differences) and Oslo II (Astronomical  
1160 Observatory) 1837.04-1867.12.

1161

1162 Fig. 10. Differences in mean monthly temperature between Esmark's observations at Øvre  
1163 Vollgate and those at the Astronomical Observatory (Esmark minus Observatory) during the  
1164 period 1837.04-1838.12. Temperatures are not corrected.

1165

1166 Fig. 11. Difference between Esmark's observations at Øvre Vollgate and Hansteen's  
1167 observations at Pilestredet (Esmark minus Hansteen) during the period 1822.11-1827.02 at  
1168 08, 15 and 21 UTC.

1169 Fig. 12. Annual mean temperatures from Stockholm Observatory and Copenhagen old  
1170 Botanical Garden compared to Esmark's observations at Øvre Vollgate in Oslo.  
1171

1172 Fig. 13. Summer mean temperature (JJA) for Stockholm Observatory, for Øvre Vollgate in  
1173 Oslo (Esmark's observations), and also for grid point 59.75°N, 10.75°E (Oslo) reconstructed  
1174 by Luterbacher et al. (2004).  
1175



1176  
1177  
1178

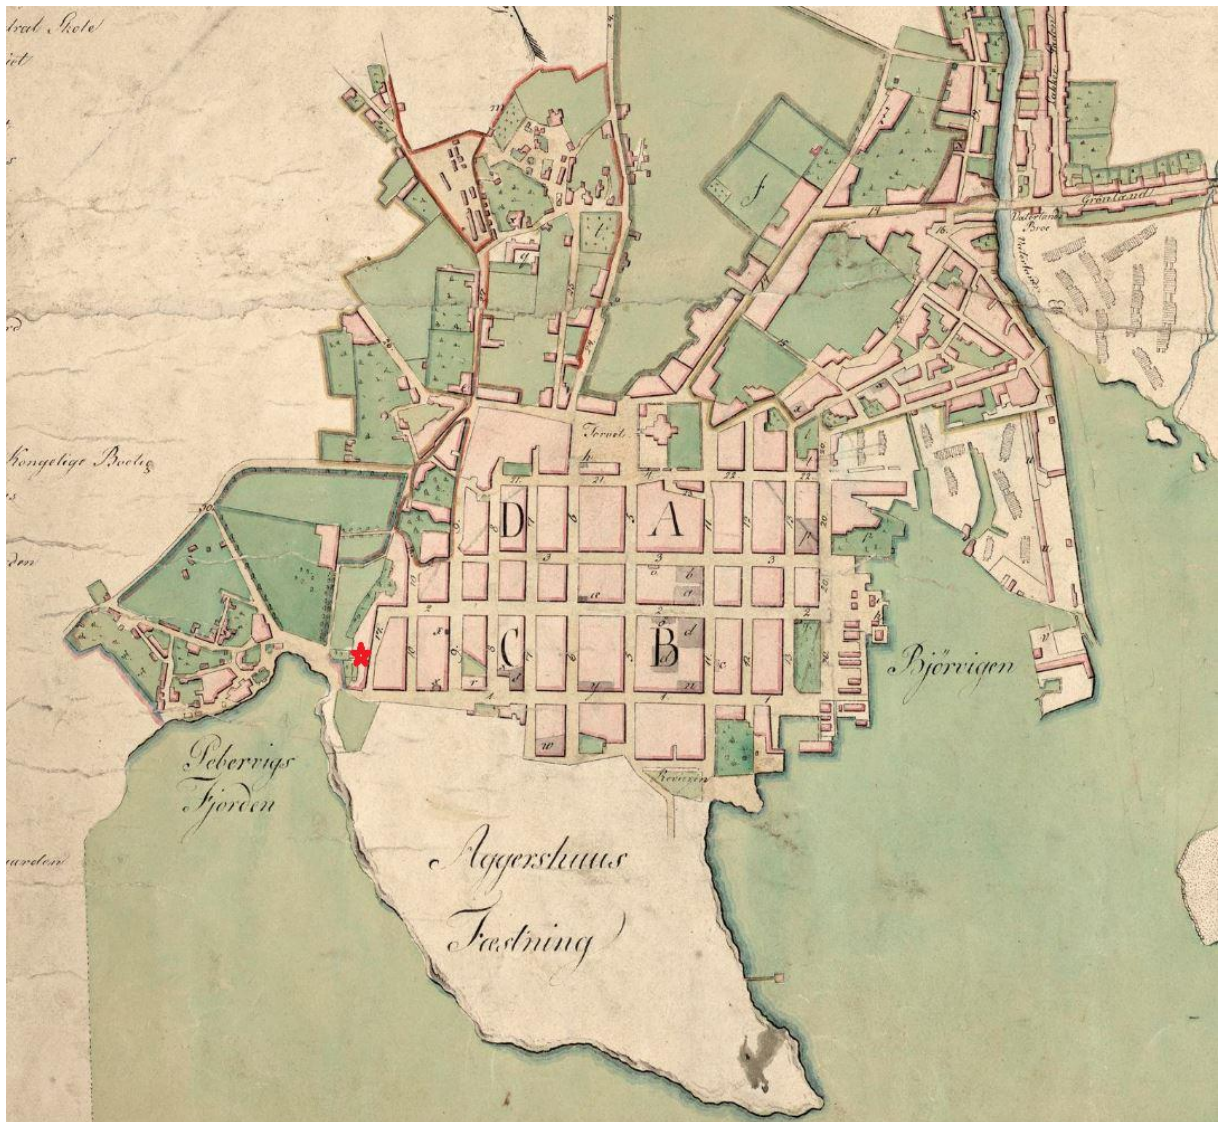

1179  
1180  
1181  
1182  
1183  
1184  
1185

Fig. 1

1186  
1187

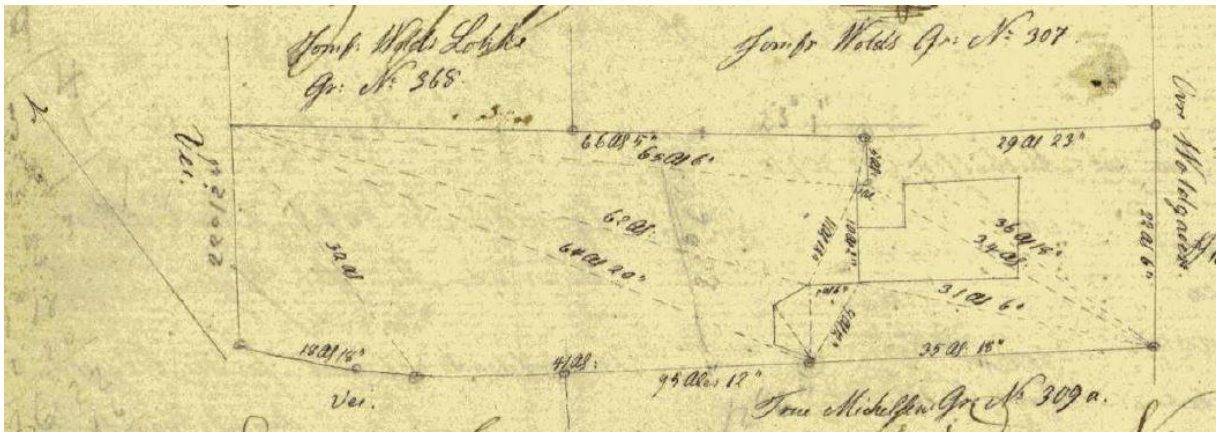

1188  
1189  
1190  
Fig. 2

1191  
1192  
1193

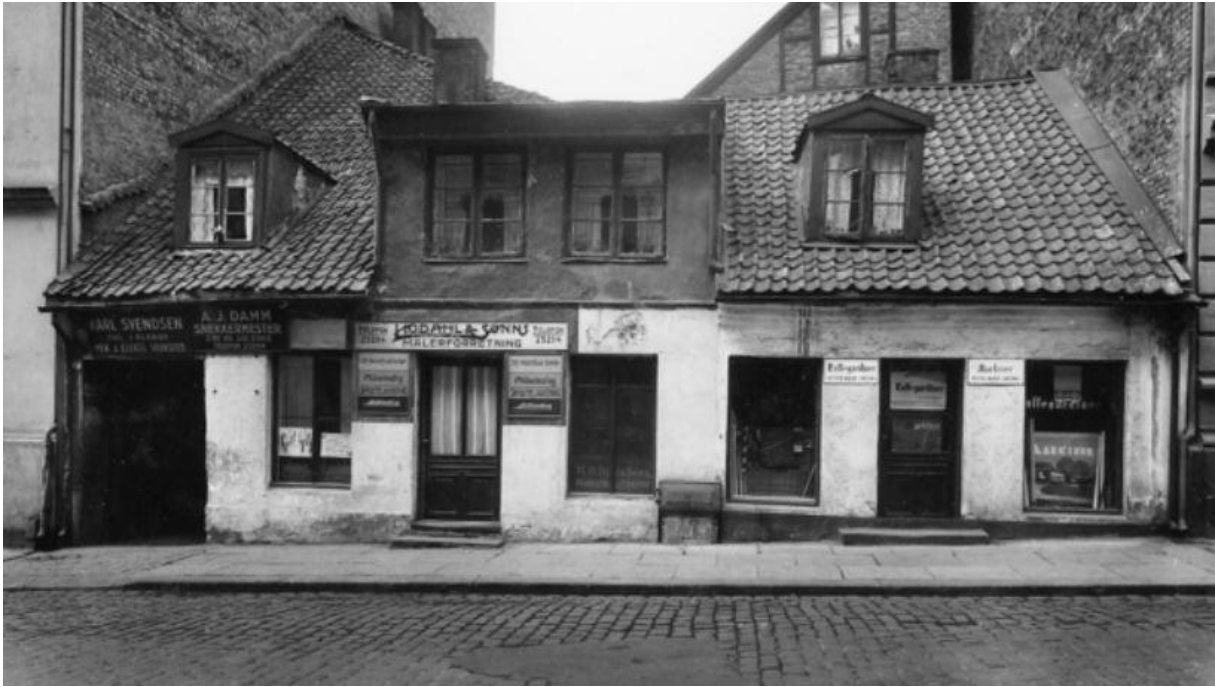

1194  
1195  
1196

Fig. 3

1197  
1198

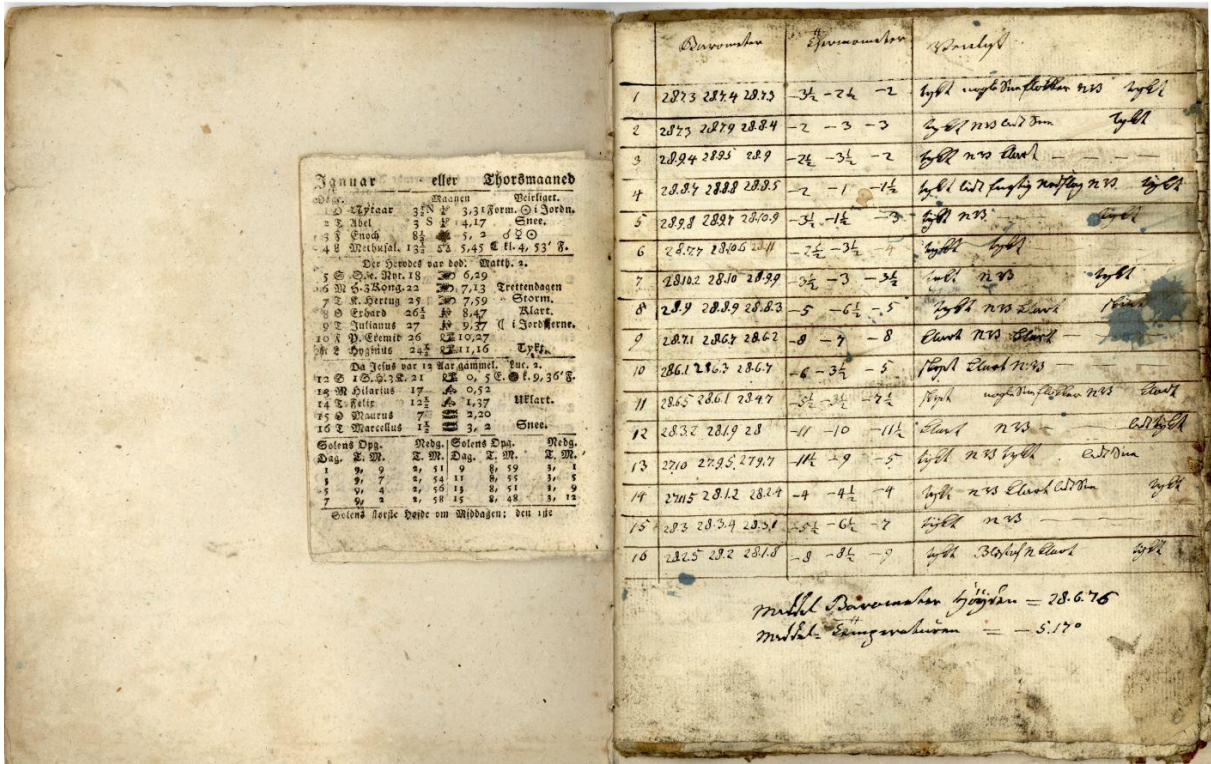

**Aguar eller Thorsmaaned**

Aguar  
1 23 N 3,31 Nerm. O i Jordn.  
2 3 Abel 3 8 4,17 Snes.  
3 4 Enok 8 3 7, 2 8 2 O  
4 5 Methusal. 13 23 5,45 E 11-4-33' 8.  
Der Orded var led: Matt. 2.  
5 6 O. H. 18 20 6,29  
6 7 G. Kong. 22 20 7,13 Trettenbaen  
7 8 K. Pterug 25 20 7,59 Strom.  
8 9 Eriard 26 18 8,47 Alart.  
9 10 Iulianus 27 18 9,37 I i Jord. Kerne.  
10 11 P. Gernit 26 20 10,27  
11 12 Hymnus 24 21 11,16 Tyff.  
Da Jesus var 13 Aar gammel. Luc. 2.  
13 14 G. H. 21 22 0, 5 2. 9, 30' 8.  
15 16 M. Orlarius 17 26 0,52  
17 18 K. Kette 12 26 1,37 Hlart.  
19 20 M. Maurus 7 26 2,20  
21 22 M. Marcellus 12 26 3, 2 Snes.  
Solens Dags. Dags. Solens Dags. Hl. Dags.  
1 9 2, 11 9 8 59 3, 1  
2 9 7 2, 14 11 8 55 3, 5  
3 9 4 2, 15 13 8 51 3, 9  
4 9 2 2, 18 15 8 48 3, 12  
Solens Heste Deide om Middagen: den 18

|    | Dauermonat     | Anzahlmonat  | 1820erlyst                      |
|----|----------------|--------------|---------------------------------|
| 1  | 2873 2874 2875 | 34 - 24 - 2  | lyst i nyst Dunstetten nro lyst |
| 2  | 2875 2879 2884 | 2 - 3 - 3    | lyst i nro ad Om lyst           |
| 3  | 2884 2885 289  | 24 - 34 - 2  | lyst nro land                   |
| 4  | 2884 2888 2885 | 2 - 1 - 14   | lyst i nro land lyst            |
| 5  | 2898 2897 2809 | 34 - 14 - 3  | lyst nro                        |
| 6  | 2877 2806 284  | 24 - 34 - 7  | lyst lyst                       |
| 7  | 2810 2810 2839 | 34 - 3 - 34  | lyst nro                        |
| 8  | 289 2889 2883  | 5 - 64 - 5   | lyst nro land                   |
| 9  | 2871 2867 2862 | 8 - 7 - 8    | land nro land                   |
| 10 | 2861 2863 2867 | 6 - 34 - 5   | lyst land nro                   |
| 11 | 2865 2861 2847 | 34 - 34 - 24 | lyst i nro land                 |
| 12 | 2832 2819 28   | 11 - 10 - 11 | land nro                        |
| 13 | 2710 2795 2797 | 114 - 9 - 5  | lyst nro lyst                   |
| 14 | 2715 2812 2814 | 4 - 44 - 4   | lyst nro land ad Om             |
| 15 | 283 2834 2831  | 284 - 64 - 7 | lyst nro                        |
| 16 | 2825 282 2818  | 8 - 84 - 9   | lyst 3. land                    |

Mittel Dauermonat 1820erlyst = 28.6.75  
Mittel Anzahlmonat = 5.170

1199  
1200

Fig. 4

Meteorologiske Jagtagelser i Christiania 1818,  
 anstillede af Prof. Esmark.

| Januar. | Barometret.             | Thermom.                        | Veirliget.         |
|---------|-------------------------|---------------------------------|--------------------|
| 1       | 28 $\frac{1}{2}$ . 3 L. | — 11 $\frac{1}{5}$ <sup>0</sup> | Taae og tykt Veir  |
| 2       | 28                      | — 10 $\frac{1}{4}$              | Ekyet.             |
| 3       | 28                      | — 8 $\frac{2}{3}$               | Tykt Veir.         |
| 4       | 28                      | — 11 $\frac{1}{6}$              | Lidt Sne.          |
| 5       | 28                      | — 9 $\frac{1}{3}$               | Lidt Sne.          |
| 6       | 27                      | 11 $\frac{2}{3}$                | Tykt og lidt Sne.  |
| 7       | 27                      | 6 $\frac{1}{6}$ ✕               | Tykt Veir.         |
| 8       | 27                      | 5 $\frac{1}{6}$ ✕               | Stærk Taae.        |
| 9       | 27                      | 10 $\frac{1}{3}$                | Taae.              |
| 10      | 27                      | 5 $\frac{3}{4}$ ✕               | Bl. af S., Nordlys |
| 11      | 27                      | 6 $\frac{1}{4}$ ✕               | Klart Veir.        |
| 12      | 27                      | 6 $\frac{1}{4}$ ✕               | Sn. og Regn S V    |
| 13      | 27                      | 5 $\frac{1}{6}$ 0               | Sn. og Regn S V    |
| 14      | 27                      | 6 $\frac{1}{3}$ ✕               | Klart.             |
| 15      | 26                      | 10 $\frac{1}{3}$ ✕              | Snee og Bl. af S.  |

Anmærkninger: Observationerne ere anstillede  
 de 34 Rhinlandske Fod over Havet, og ere Mid-  
 deltaget af Observationer, anstillede Morgen,  
 Middag og Aften. Barometerhøjderne ere cor-  
 rigerede saaledes, som de skulle være, dersom  
 Barometret havde været udsat for 0<sup>o</sup> Tempera-  
 tur. Thermometret hænger frit imod Nord.

1201  
 1202 Fig. 5

1203  
1204  
1205  
1206  
1207  
1208  
1209  
1210  
1211  
1212  
1213  
1214  
1215  
1216  
1217  
1218  
1219

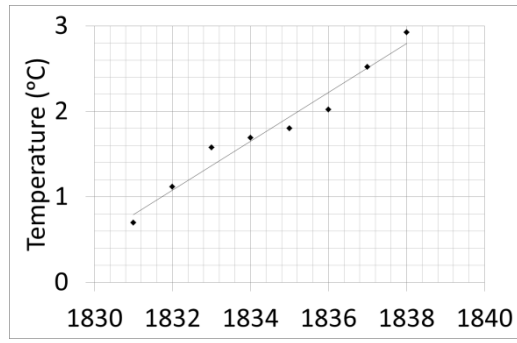

Fig. 6.

1220  
1221  
1222  
1223

Fig. 7

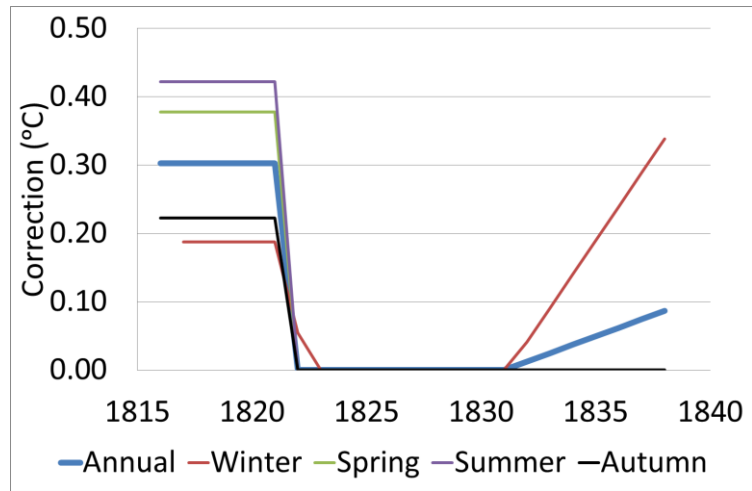

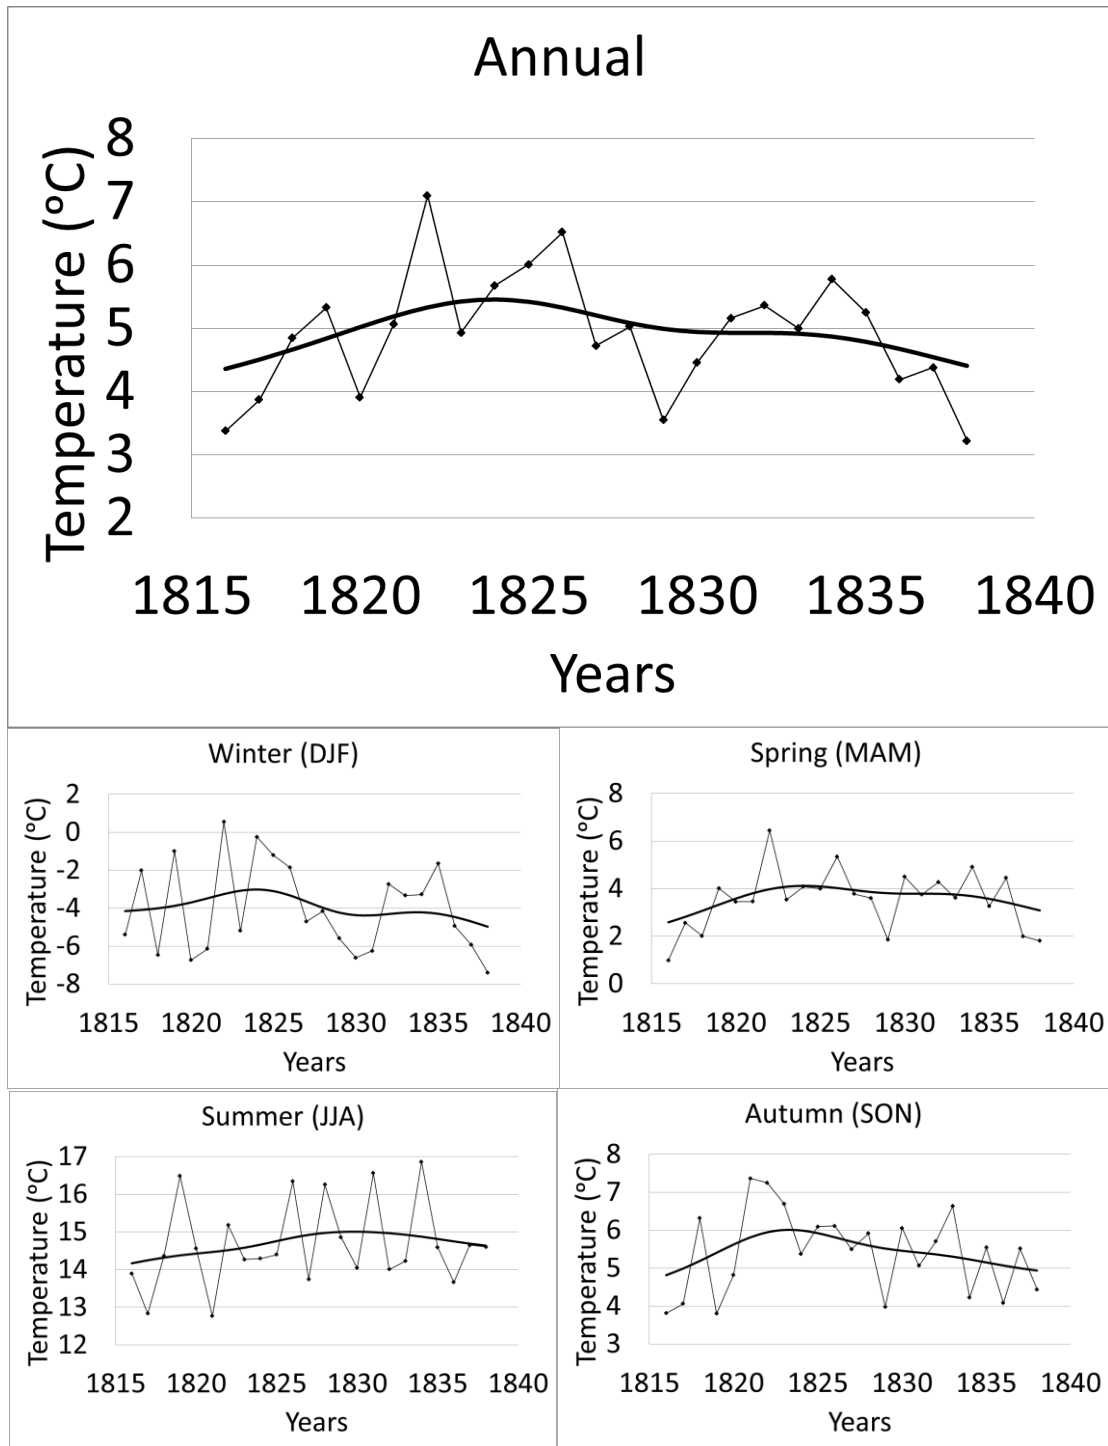

1224

1225

1226

1227

1228

Fig. 8.



1229

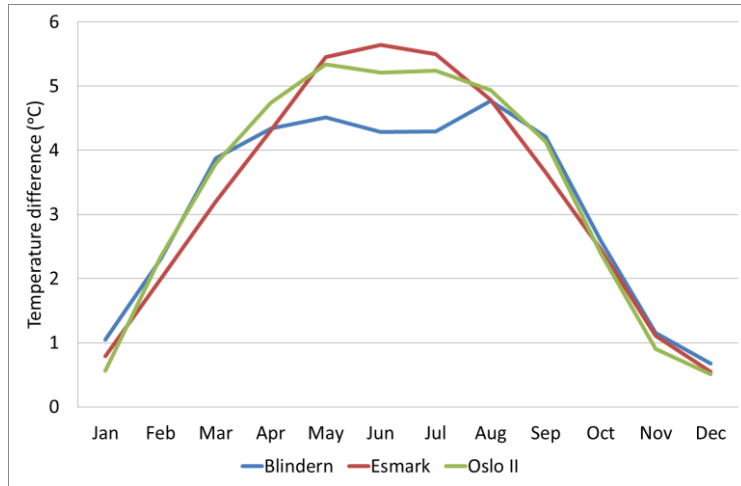

1230  
1231  
1232  
1233

Fig. 9

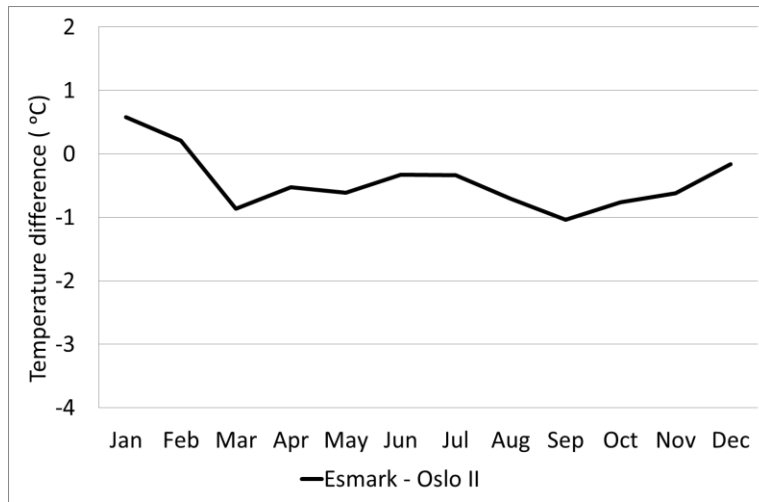

1234  
1235  
1236  
1237  
1238  
1239

Fig. 10

1240

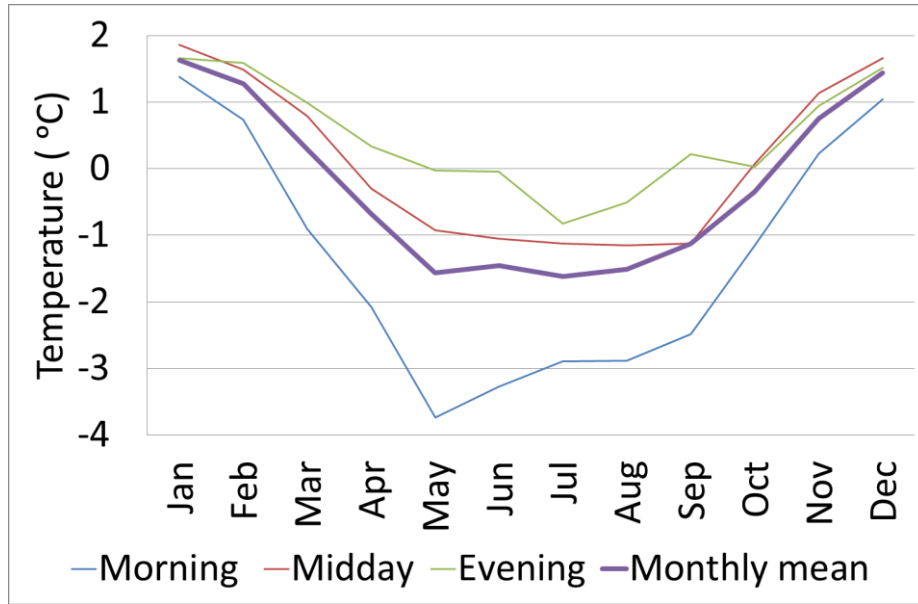

1241  
1242  
1243  
1244  
1245

Fig. 11.

1246

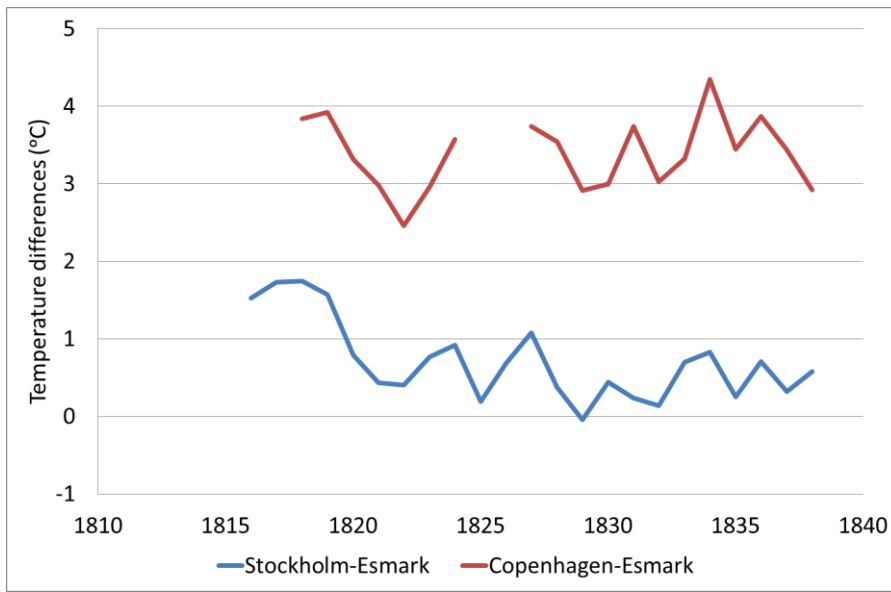

1247

1248 Fig. 12

1249

1250

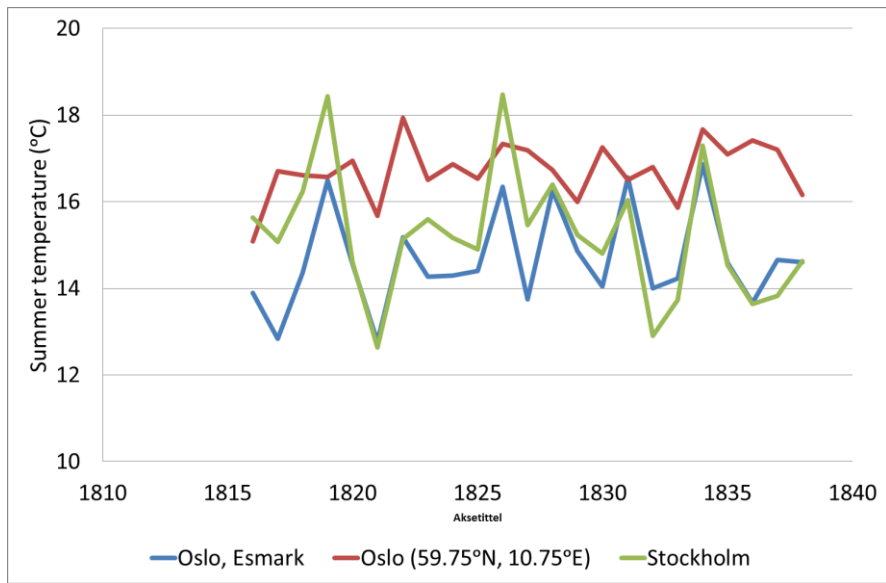

1251

1252

1253 Fig. 13

1254
